# Supplementary material for: Dysregulation of Glucagon Secretion by Hyperglycemia-Induced Sodium-Dependent Reduction of ATP Production
Source: PubMed Central journal article supplement (PMC6370947; doi:10.1016/j.cmet.2018.10.003), 2019-02-05
Supplement: mmc2.pdf [file mmc2.pdf]

# Cell Metabolism

## Dysregulation of Glucagon Secretion by Hyperglycemia-Induced Sodium-Dependent Reduction of ATP Production

### Graphical Abstract

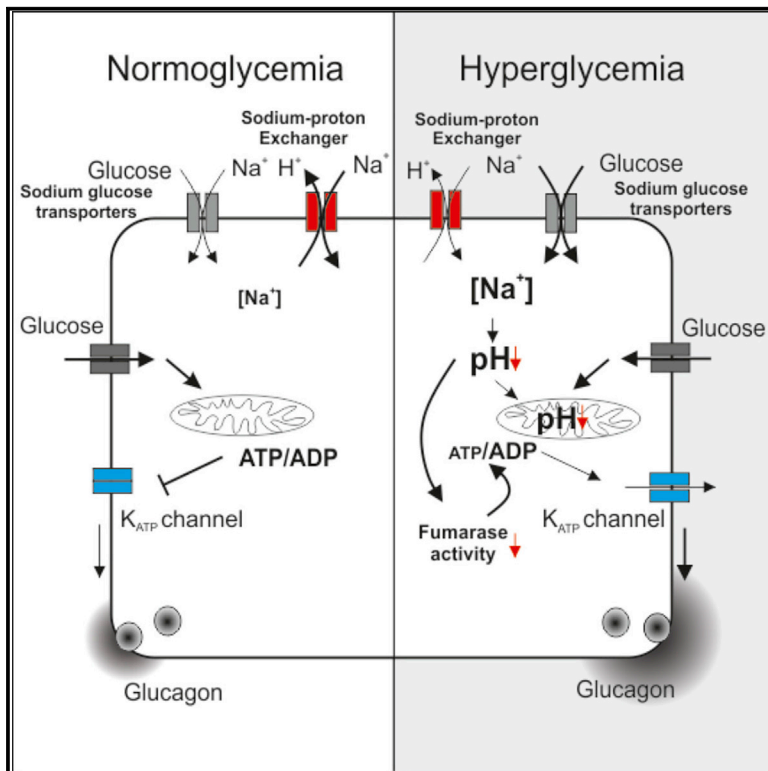

### Authors

Jakob G. Knudsen,  
Alexander Hamilton,  
Reshma Ramracheya, ...,  
Frances M. Ashcroft, Julie Adam,  
Patrik Rorsman

### Correspondence

julie.adam@ndm.ox.ac.uk (J.A.),  
patrik.rorsman@drl.ox.ac.uk (P.R.)

### In Brief

In diabetes, glucagon secretion is dysregulated but the underlying mechanisms are not fully understood. Knudsen et al. report that hyperglycemia impairs glucagon secretion by SGLT-dependent elevation of intracellular Na<sup>+</sup>, leading to acidification, reduced ATP production, and dysregulated K<sub>ATP</sub> channel activity in  $\alpha$  cells. The SGLT mechanism may also impair heart and kidney cell ATP production.

### Highlights

- Chronic hyperglycemia inhibits fumarase and glucagon secretion by  $\alpha$  cells
- Hyperglycemia causes SGLT-dependent reduction of cytoplasmic pH and ATP production
- SGLT inhibitors normalize cytoplasmic pH, ATP production, and glucagon secretion
- The Na-dependent mechanism may impair ATP production in other SGLT-expressing cells

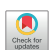

# Dysregulation of Glucagon Secretion by Hyperglycemia-Induced Sodium-Dependent Reduction of ATP Production

Jakob G. Knudsen,<sup>1,7</sup> Alexander Hamilton,<sup>1,7</sup> Reshma Ramracheya,<sup>1,7</sup> Andrei I. Tarasov,<sup>1,7</sup> Melissa Brereton,<sup>2</sup> Elizabeth Haythorne,<sup>2</sup> Margarita V. Chibalina,<sup>1</sup> Peter Spégel,<sup>3</sup> Hindrik Mulder,<sup>4</sup> Quan Zhang,<sup>1</sup> Frances M. Ashcroft,<sup>2</sup> Julie Adam,<sup>1,5,\*</sup> and Patrik Rorsman<sup>1,6,8,\*</sup>

<sup>1</sup>Oxford Centre for Diabetes, Endocrinology and Metabolism, Radcliffe Department of Medicine, University of Oxford, Oxford OX3 7LE, UK

<sup>2</sup>Department of Physiology, Anatomy & Genetics, Parks Road, Oxford OX1 3PT, UK

<sup>3</sup>Centre for Analysis and Synthesis, Lund University Diabetes Centre, Department of Chemistry, Naturvetarvägen 14, Lund 221 00, Sweden

<sup>4</sup>Unit of Molecular Metabolism, Lund University Diabetes Centre, Department of Clinical Research in Malmö, Jan Waldenströms Gata 35, Malmö 205 02, Sweden

<sup>5</sup>Nuffield Department of Clinical Medicine, University of Oxford, NDM Research Building, Oxford OX3 7FZ, UK

<sup>6</sup>Metabolic Research, Department of Neuroscience and Physiology, Sahlgrenska Academy, University of Göteborg, Box 433, Göteborg 405 30, Sweden

<sup>7</sup>These authors contributed equally

<sup>8</sup>Lead Contact

\*Correspondence: [julie.adam@ndm.ox.ac.uk](mailto:julie.adam@ndm.ox.ac.uk) (J.A.), [patrik.rorsman@drl.ox.ac.uk](mailto:patrik.rorsman@drl.ox.ac.uk) (P.R.)  
<https://doi.org/10.1016/j.cmet.2018.10.003>

## SUMMARY

Diabetes is a bihormonal disorder resulting from combined insulin and glucagon secretion defects. Mice lacking fumarase (*Fh1*) in their  $\beta$  cells (*Fh1* $\beta$ KO mice) develop progressive hyperglycemia and dysregulated glucagon secretion similar to that seen in diabetic patients (too much at high glucose and too little at low glucose). The glucagon secretion defects are corrected by low concentrations of tolbutamide and prevented by the sodium-glucose transport (SGLT) inhibitor phlorizin. These data link hyperglycemia, intracellular  $\text{Na}^+$  accumulation, and acidification to impaired mitochondrial metabolism, reduced ATP production, and dysregulated glucagon secretion. Protein succination, reflecting reduced activity of fumarase, is observed in  $\alpha$  cells from hyperglycemic *Fh1* $\beta$ KO and  $\beta$ -V59M gain-of-function  $\text{K}_{\text{ATP}}$  channel mice, diabetic Goto-Kakizaki rats, and patients with type 2 diabetes. Succination is also observed in renal tubular cells and cardiomyocytes from hyperglycemic *Fh1* $\beta$ KO mice, suggesting that the model can be extended to other SGLT-expressing cells and may explain part of the spectrum of diabetic complications.

## INTRODUCTION

Plasma glucose concentrations are maintained by a tug-of-war between the hypoglycemic effect of insulin and the hyperglycemic effect of glucagon. Under normal conditions, plasma glucose in humans is maintained at  $\sim 5$  mM. The benefits of good glycemic control in diabetic patients are well known: it pre-

vents or delays diabetic retinopathy, nephropathy, and neuropathy (Cryer, 2014).

Type 2 diabetes (T2D) results from a combination of insufficient insulin secretion and defective glucagon secretion and culminates in hyperglycemia (Unger and Orci, 2010). T2D affects every cell of the body, which explains the broad range of complications, including accelerated cardiac and renal failure (Forbes and Cooper, 2013). Dysregulated glucagon secretion in T2D manifests as over-secretion under hyperglycemic conditions but insufficient release under hypoglycemic conditions (Dunning et al., 2005; Rorsman et al., 2014). If not alleviated, hypoglycemia results in glucose deficiency in the brain, coma, and ultimately death. In normal situations, hypoglycemia triggers a counter-regulatory response in the  $\alpha$  cells (stimulation of glucagon release with resultant increase in hepatic glucose production), but this does not occur in many type 1 diabetes (T1D) and some T2D patients (Cryer, 1998). Patients with T1D experience on average two episodes of symptomatic hypoglycemia every week (Frier, 2009), and it has been estimated that up to 10% of these patients die of iatrogenic hypoglycemia (Skriverhaug et al., 2006). Therefore, hypoglycemia has been referred to as the limiting factor in diabetes therapy (Cryer, 2002).

Why counter-regulation fails in diabetic patients is not known, but, interestingly, inhibition of mitochondrial ATP production, or pharmacological activation of  $\text{K}_{\text{ATP}}$  channels using diazoxide, recapitulates the dysregulation of glucagon secretion (Zhang et al., 2013). Collectively, these observations suggest that the glucagon secretion defect in diabetic patients is a consequence of disturbed mitochondrial metabolism, but the underlying mechanisms remain obscure.

$\beta$  cell-specific ablation of the gene encoding the Krebs cycle enzyme fumarase in mice (designated *Fh1* $\beta$ KO) results in progressive diabetes. *Fh1* $\beta$ KO mice are born normoglycemic and remain so for approximately 8 weeks. Thereafter, they develop hyperglycemia due to loss of glucose-induced insulin secretion (Adam et al., 2017). Here we show that the age-dependent loss

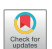

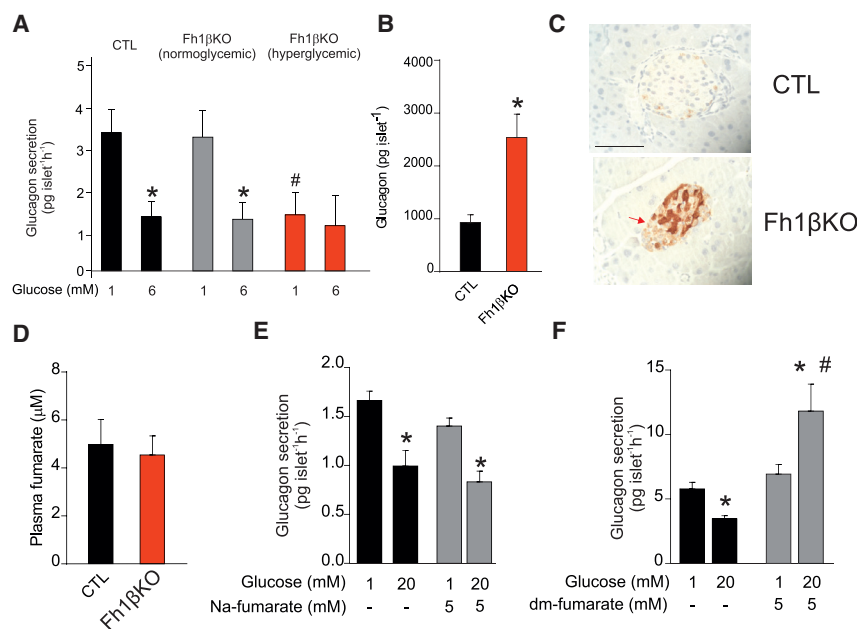

**Figure 1. Dysregulation of Glucagon Secretion in Fh1 $\beta$ KO Mice**

(A) Glucagon secretion in isolated islets from control (CTL; black) and normoglycemic (plasma glucose: <12 mM; gray) and diabetic (plasma glucose: >20 mM; red) Fh1 $\beta$ KO mice at 1 and 6 mM glucose. \* $p < 0.05$  versus 1 mM glucose; # $p < 0.05$  versus 1 mM glucose in normoglycemic Fh1 $\beta$ KO islets ( $n = 8-9$  experiments using islets from 12 mice).

(B) Islet glucagon content in normoglycemic and hyperglycemic Fh1 $\beta$ KO mice. \* $p < 0.05$  ( $n = 12$  mice of each group, each measurement based on 12 islets).

(C) Immunohistochemistry (IHC) for succination (2SC) in CTL and Fh1 $\beta$ KO islets. Scale bar, 50  $\mu\text{m}$ . (D) Plasma fumarate levels in CTL and severely hyperglycemic (>20 mM) Fh1 $\beta$ KO mice ( $n = 22$  CTL and  $n = 13$  Fh1 $\beta$ KO mice).

(E and F) Glucagon secretion in isolated islets from wild-type (NMR1) islets at 1 and 20 mM glucose and supplementing the extracellular medium with 5 mM Na<sub>2</sub>-fumarate (E;  $n = 4$  experiments using islets from three mice), or 5 mM dimethyl (dm)-fumarate (F;  $n = 12$  experiments using islets from four mice). \* $p < 0.05$  versus 1 mM glucose; # $p < 0.05$  versus 20 mM glucose.

All data presented as mean values  $\pm$  SEM of indicated number of experiments. See also Figure S1.

of insulin secretion is paralleled by dysregulation of glucagon secretion similar to that in T2D. Similar defects in glucagon secretion develop in other diabetic models: transgenic mice that express a human neonatal diabetes mutation (Kir6.2-V59M) specifically in  $\beta$  cells (Breteron et al., 2014) and Goto-Kakizaki (GK) rats, a model of polygenic diabetes (Granhall et al., 2006).

We have explored the mechanism underlying hyperglycemia-induced dysregulation of glucagon secretion and our data highlight a critical role for Na<sup>+</sup>-glucose co-transport (SGLT)-mediated Na<sup>+</sup> uptake and intracellular acidification. We propose that this concept may be extended to other cell types and explain part of the spectrum of diabetes-associated complications.

## RESULTS

### Dysregulation of Glucagon Secretion in Fh1 $\beta$ KO Mice

Mice lacking *Fh1* in pancreatic  $\beta$  cells (Fh1 $\beta$ KO) are almost normoglycemic until 10–13 weeks of age (10 weeks in male and 13 weeks in female mice), when they exhibit a rapid and progressive deterioration of glucose homeostasis and insulin secretion (Figures S1A–S1C) (Adam et al., 2017).

We compared glucagon secretion in islets isolated from normo- and hyperglycemic Fh1 $\beta$ KO mice. In islets from normoglycemic Fh1 $\beta$ KO mice, the effects of glucose on glucagon secretion were almost identical to those seen in littermate controls (CTLs) (Figure 1A). In these non-diabetic mice, glucagon secretion was high at 1 mM glucose and inhibited by >60% when glucose was elevated to 6 mM (the concentration associated with maximal inhibition of glucagon release; Walker et al., 2011). However, once hyperglycemia had presented, glucagon secretion at 1 mM glucose was reduced by 60% and elevation of glucose exerted no further inhibitory effect. The reduction of glucagon secretion at 1 mM glucose is remarkable given that glucagon content was increased by 150% in Fh1 $\beta$ KO islets

compared with CTL islets (Figure 1B). The increase in content is most likely due to an increase by  $\sim 150\%$  in the proportion of  $\alpha$  cells within islets ( $61\% \pm 2\%$  cells/islet in hyperglycemic Fh1 $\beta$ KO versus  $25\% \pm 2\%$  cells/islet in CTLs;  $n = 20$  islets from five mice per group;  $p < 0.001$ ). Thus, glucagon secretion at 1 mM glucose relative to glucagon content is reduced by >80% (from  $\sim 0.33\%/hr$  to  $0.06\%/hr$ ). In a separate experimental series, we varied glucose between 2 and 20 mM (Figure S1D). Under these conditions, glucagon secretion at 2 mM glucose was reduced by 75% in hyperglycemic Fh1 $\beta$ KO mice compared with CTL mice, and, paradoxically, elevation of glucose stimulated rather than inhibited glucagon secretion, similar to the response of human islets from T2D patients at this high glucose concentration (Walker et al., 2011).

Fumarate catalyzes the hydration of fumarate to malate, and its genetic ablation results in a dramatic increase in intracellular fumarate content (Pollard et al., 2003). Fumarate can react with cysteine residues in proteins to form S-[2-succino]cysteine (2SC), a stable post-translational modification termed succination (Frizzell et al., 2011). We investigated the levels of succination in islets from Fh1 $\beta$ KO by immunohistochemistry with the 2SC antibody. As expected, there was strong 2SC staining in the  $\beta$  cells. However, some succination (albeit lower than in  $\beta$  cells) was also observed in the non- $\beta$  cells (arrow, Figure 1C; see also Figure 6D). Thus,  $\beta$  cell-specific knockout of *Fh1* also results in elevated fumarate levels in  $\alpha$  cells (which are genetically normal).

Plasma fumarate levels were not elevated in hyperglycemic Fh1 $\beta$ KO mice (Figure 1D). Moreover, culturing of wild-type islets with exogenous Na<sub>2</sub>-fumarate for 24 hr did not mimic the effect on glucagon secretion of ablating *Fh1* in  $\beta$  cells (Figure 1E). Thus, the dysregulation of glucagon secretion in hyperglycemic Fh1 $\beta$ KO mice is unlikely to result from “leakage” of fumarate from  $\beta$  cells. However, in islets incubated with membrane-permeable dimethyl-fumarate, glucose not only failed to inhibit

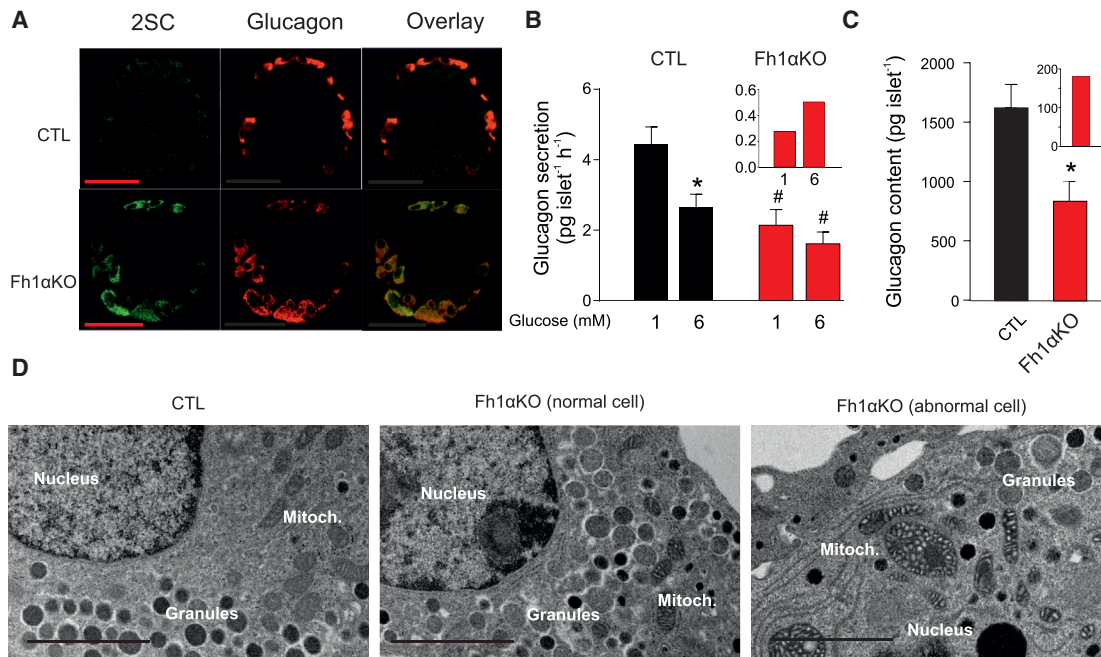

**Figure 2. Ablation of Fh1 in  $\alpha$  Cells Recapitulates the Effects of Diabetes on Glucagon Secretion**

(A) IHC for 2SC (green), glucagon (red) and overlay (yellow) islets from CTL (above) and Fh1 $\alpha$ KO mice. Note strong 2SC labeling of most glucagon-positive cells. Scale bar, 50  $\mu$ m. Data are representative of four mice of each genotype.

(B) Glucagon secretion in CTL and Fh1 $\alpha$ KO islets measured during 1 hr static incubations at 1 and 6 mM glucose. \* $p < 0.05$  versus 1 mM glucose; # $p < 0.05$  versus corresponding group in CTL mice ( $n = 7$ –8 experiments using islets from three CTL and three Fh1 $\alpha$ KO mice). Inset: glucagon secretion at 1 and 6 mM glucose after compensating for  $\alpha$  cells that retain Fh1.

(C) Glucagon content in islets from CTL and Fh1 $\alpha$ KO mice. \* $p < 0.05$  ( $n = 3$  mice for each genotype). Inset: glucagon content after compensating for  $\alpha$  cells that retain Fh1.

(D) Electron micrographs of  $\alpha$  cells in a CTL islet (left), a normal  $\alpha$  cell in an Fh1 $\alpha$ KO islet (center) and an abnormal  $\alpha$  cell in an Fh1 $\alpha$ KO islet (right;  $n = 5$  cells). Scale bar, 2  $\mu$ m.

All data presented as mean values  $\pm$  SEM of indicated number of experiments. See also Figure S2.

but stimulated glucagon secretion (Figure 1F), echoing the changes seen in Fh1 $\beta$ KO mice (Figure S1D). Collectively, these data suggest that ablation of Fh1 in  $\beta$  cells also increases intracellular fumarate levels in  $\alpha$  cells by a systemic effect and this underlies the observed dysregulation of glucagon secretion.

#### Ablation of Fh1 in $\alpha$ Cells Mimics the Effects of Hyperglycemia on Glucagon Secretion

We generated  $\alpha$  cell-specific Fh1 knockout (Fh1 $\alpha$ KO) mice to explore the role of reduced fumarase activity and consequent increased fumarate in the dysregulation of glucagon secretion. Deletion of fumarase, inferred from 2SC labeling, occurred in  $58\% \pm 18\%$  of  $\alpha$  cells ( $n = 4$  mice; Figure 2A). Glucagon secretion in Fh1 $\alpha$ KO islets at 1 mM glucose was reduced by  $>40\%$ , and elevating glucose to 6 mM was, unlike the response of CTL islets, not associated with a statistically significant suppression at elevated glucose in Fh1 $\alpha$ KO islets (Figure 2B). These changes were associated with a 50% reduction in islet glucagon content (Figure 2C). We corrected (mathematically) glucagon secretion in Fh1 $\alpha$ KO mice, to account for the 42% of  $\alpha$  cells in which recombination did not occur, by assuming that glucagon secretion by  $\alpha$  cells in this model was the same as in CTL islets. This analysis suggests that, in Fh1 $\alpha$ KO, the residual glucagon secretion is limited to only  $\approx 15\%$  of that in CTL islets and that increasing

glucose from 1 to 6 mM stimulated rather than inhibited glucagon secretion (Figure 2B, inset). Analogously, we estimate that glucagon content in the Fh1 $\alpha$ KO mice is reduced by 90%: the 40% of  $\alpha$  cells in which recombination did not occur will account for 650 pg/islet ( $1,629 \times 0.4$ ) of the 830 pg/islet in the Fh1 $\alpha$ KO. Thus, 180 pg/islet is what can be accounted for by the fraction of  $\alpha$  cells that have lost Fh1 (Figure 2C, inset).

In Fh1 $\alpha$ KO mice, insulin secretion and content are normal (Figures S2A and S2B) and they exhibit lower plasma glucose levels than CTLs during an intraperitoneal glucose tolerance test (Figure S2C). Insulin tolerance tests did not suggest increased insulin sensitivity that could account for the improved glucose tolerance in Fh1 $\alpha$ KO mice (Figure S2D).

Electron microscopy revealed that a subset of  $\alpha$  cells in Fh1 $\alpha$ KO islets exhibit abnormal ultrastructural morphology, including swollen mitochondria and fewer secretory granules, while others have normal mitochondria comparable with CTL islets (Figure 2D).

#### Defective Glucose Regulation of Glucagon Secretion in Hyperglycemic Mice Results from Increased $K_{ATP}$ Channel Activity

We hypothesized that the dysregulation of glucagon secretion in the Fh1 $\beta$ KO mice is a consequence of hyperglycemia. If this



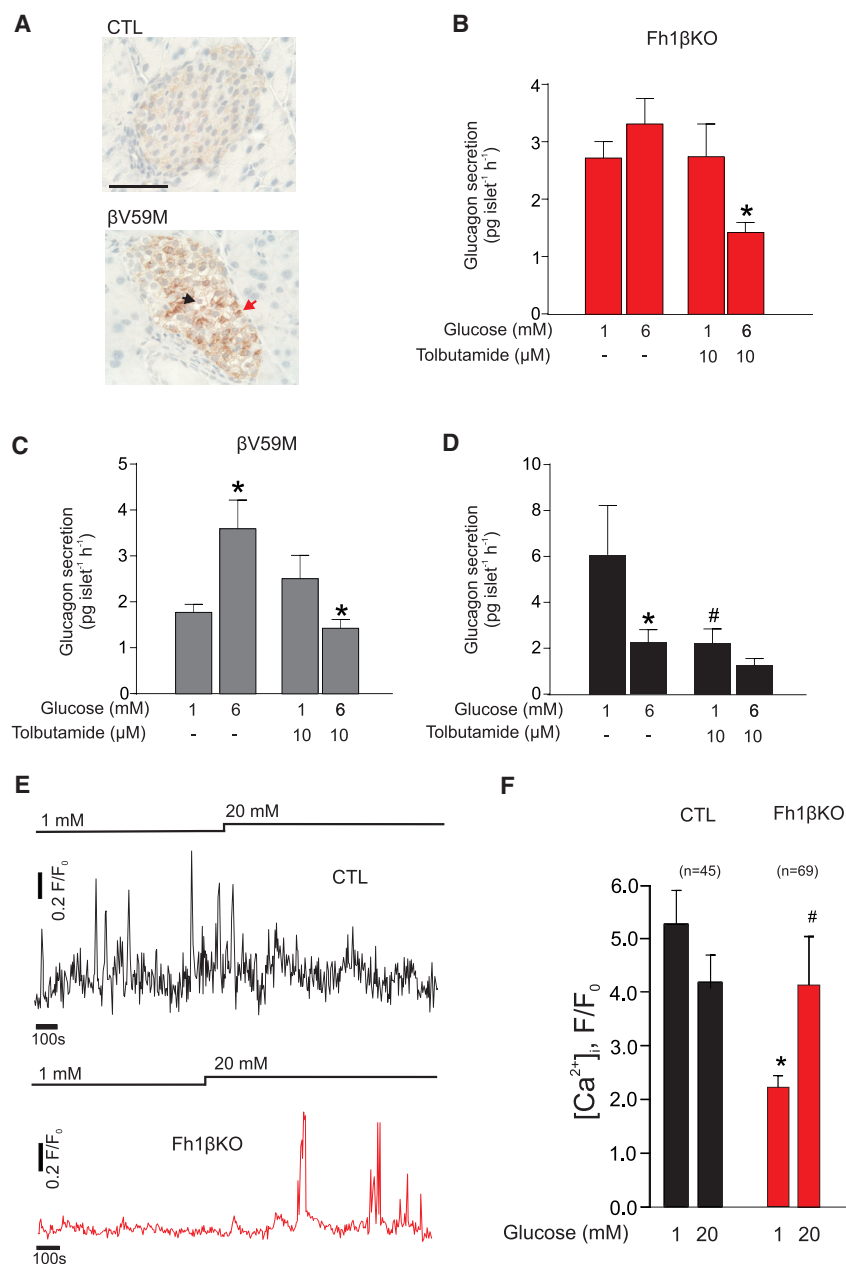

### Figure 3. Hyperglycemia-Induced Changes in Glucagon Secretion Are Corrected by Modulation of $K_{ATP}$ Channels

(A) IHC for succination (2SC) in CTL and  $\beta$ V59M islets. Scale bar, 50  $\mu$ m.

(B and C) Glucagon secretion in hyperglycemic Fh1 $\beta$ KO (B) and  $\beta$ V59M (C) islets measured during 1 hr static incubations at 1 and 6 mM glucose in the absence or presence of a low concentration (10  $\mu$ M) of the  $K_{ATP}$  channel blocker tolbutamide. \* $p < 0.05$  versus 1 mM glucose ( $n = 7$ –8 experiments using islets from at least three Fh1 $\beta$ KO and three  $\beta$ V59M mice).

(D) As in (B) and (C), but experiments obtained from CTL littermates of ( $n = 6$  experiments/6 mice) Fh1 $\beta$ KO and  $\beta$ V59M mice ( $n = 6$ –12 experiments/6 mice). \* $p < 0.05$  versus 1 mM glucose, # $p < 0.05$  versus 1 mM glucose without tolbutamide.

(E)  $[Ca^{2+}]_i$  measurements in  $\alpha$  cells, using the calcium dye fluo4, within CTL (black) or hyperglycemic Fh1 $\beta$ KO (red) islets at 1 and 20 mM glucose as indicated. In both genotypes  $\alpha$  cells were identified by the  $[Ca^{2+}]_i$  response to adrenaline.

(F) Histogram summarizing effects of increasing glucose on  $[Ca^{2+}]_i$ , measured using fluo4, in  $\alpha$  cells from normoglycemic CTL (black) and hyperglycemic Fh1 $\beta$ KO (red) islets as indicated. Data are presented as area under the curve. \* $p < 0.05$  versus 1 mM glucose in CTL mice. # $p < 0.05$  versus 1 mM glucose in Fh1 $\beta$ KO mice. Data are from indicated number of cells ( $n$ ) in three islets from one CTL mouse and five islets from two Fh1 $\beta$ KO mice, respectively.

All data presented as mean values  $\pm$  SEM of indicated number of experiments. See also Figure S7.

is the case, glucagon secretion defects similar to those observed in Fh1 $\beta$ KO mice should also develop in other models of hyperglycemia. We tested this using an inducible mouse model of neonatal diabetes with  $\beta$  cell-specific expression of an activating  $K_{ATP}$  channel mutation (Kir6.2-V59M) ( $\beta$ V59M) (Brereton et al., 2014). Nutrient-stimulated insulin secretion was switched off in  $\beta$ V59M mice at 12–14 weeks of age. After 14 days of hyperglycemia,  $\alpha$  cells in  $\beta$ V59M islets showed similar levels of protein succination as  $\alpha$  cells in islets from hyperglycemic Fh1 $\beta$ KO mice (compare Figures 1C and 3A; see also Figure 6).

Similar to Fh1 $\beta$ KO mice, glucagon secretion in  $\beta$ V59M islets showed abnormal glucose regulation: glucagon secretion at 1 mM glucose was low and stimulated rather than inhibited

produces a statistically significant reduction of glucagon secretion (Figure 3D).

These data suggest that the glucagon secretion defect in hyperglycemic  $\beta$ V59M and Fh1 $\beta$ KO mice results from a small increase in  $K_{ATP}$  channel activity; if the increase was dramatic, then the low concentration of tolbutamide used would not be able to modulate glucagon secretion. The effects of tolbutamide are not mediated by stimulation of insulin secretion and there were no statistically significant effects of tolbutamide on insulin secretion in Fh1 $\beta$ KO islets (Figure S1E). If  $K_{ATP}$  channel activity is increased in  $\alpha$  cells from hyperglycemic Fh1 $\beta$ KO mice, then electrical activity should be reduced, similar to what is produced by pharmacological (using diazoxide) or genetic activation (by expression of the V59M gain-of-function mutation) (Zhang

et al., 2013). Direct electrophysiological measurements are difficult in diabetic Fh1 $\beta$ KO mice and recordings of the ATP/ADP ratio require prior infection and culture of the islets. Therefore, we used  $\alpha$  cell intracellular calcium ( $[Ca^{2+}]_i$ ) measurements as a proxy for electrical activity (and the cytoplasmic ATP/ADP ratio). We identified  $\alpha$  cells in islets from CTL and Fh1 $\beta$ KO mice by the spontaneous  $[Ca^{2+}]_i$  oscillations at 1 mM glucose and responsiveness to adrenaline (Hamilton et al., 2018). In the CTL  $\alpha$  cells,  $[Ca^{2+}]_i$  was only marginally reduced by increasing glucose from 1 to 20 mM (Figure 3E), but this effect did not reach statistical significance (Figure 3F). When the same type of measurements were repeated in hyperglycemic Fh1 $\beta$ KO mice,  $[Ca^{2+}]_i$  was reduced by 60% and increased by 150% in response to an elevation of glucose to 20 mM (Figures 3E and 3F). Collectively, these observations suggest that the cytoplasmic ATP/ADP ratio is reduced in  $\alpha$  cells from hyperglycemic Fh1 $\beta$ KO mice, leading to the increase in  $K_{ATP}$  channel activity that accounts for the inverted response to glucose.

### Hyperglycemia Results in Intracellular Acidification of $\alpha$ Cells

The finding that  $K_{ATP}$  channel closure could correct the dysregulated glucagon secretion in hyperglycemic  $\beta$ V59M and Fh1 $\beta$ KO mice suggests that ATP production in the  $\alpha$  cell was compromised. Because succination was observed in  $\alpha$  cells in both mouse models, we speculated that the reduced ATP production could be linked to increased fumarate caused by a reduction in fumarase expression. However, fumarase was detectable by immunocytochemistry in  $\alpha$  cells of Fh1 $\beta$ KO mice (Figure S2E). Thus, reduced expression of *Fh1* is unlikely to explain the glucagon secretion defect and the protein succination in  $\alpha$  cells from Fh1 $\beta$ KO mice.

The mitochondrial matrix is alkaline, and Krebs cycle enzymes typically have their maximum catalytic activity at high pH (Bernstein and Everse, 1978; Lai and Cooper, 1986; Willson and Tipton, 1980). We confirmed that this was also the case for fumarase: there was a strong reduction of fumarase activity when pH lowered from 7.6 to 7 and 6.6 in a cell-free system (Figure S2F). At the lowest pH, fumarase activity was only 5% of that seen at pH 7.6. Therefore, we conclude that the reduced fumarase activity in  $\alpha$  cells may be a consequence of intracellular acidification rather than lowered gene expression.

$\beta$  cells from Fh1 $\beta$ KO mice have a lower cytoplasmic pH ( $pH_i$ ), an effect that was attributed to the accumulation of acidic fumarate (Adam et al., 2017), and  $pH_i$  is also lower in  $\alpha$  cells from hyperglycemic Fh1 $\beta$ KO mice than in CTLs (Figure 4A). Although increasing glucose to 20 mM reduced  $pH_i$  in  $\alpha$  cells in islets from both CTL and normoglycemic Fh1 $\beta$ KO mice, no acidification was seen in  $\alpha$  cells from hyperglycemic Fh1 $\beta$ KO mice (Figures 4B and 4C).

### Intracellular Acidification Results from SGLT-Dependent Intracellular $Na^+$ Accumulation

Intracellular pH is controlled by plasmalemmal and intracellular  $Na^+$ - $H^+$  exchangers (NHEs) (Casey et al., 2010). The significance of NHEs in the regulation of  $\alpha$  cell  $pH_i$  is illustrated by the prompt reduction of  $pH_i$  observed when extracellular  $Na^+$  is reduced from the normal 140 mM to 10 mM (Figures S3A and S3B). Of the NHEs, NHE1 (*SLC9A1*) and NHE6 (*SLC9A6*) are expressed

at particularly high levels in mouse and human  $\alpha$  cells (Blodgett et al., 2015; DiGruccio et al., 2016). We used ethylisopropyl amiloride (EIPA), an inhibitor of plasmalemmal NHEs (Masereel et al., 2003), to explore the role of NHEs in control  $\alpha$  cells where  $pH_i$  and normal ionic gradients are maintained. In wild-type islets exposed to 10 mM glucose, EIPA produced a concentration-dependent intracellular acidification in  $\alpha$  cells (Figures 4D and 4E).

Glucose uptake in  $\alpha$  cells is partially mediated by SGLTs (Bonner et al., 2015). We therefore speculated that hyperglycemia may cause intracellular acidification via an increase in the intracellular  $Na^+$  concentration ( $[Na^+]_i$ ).

Although islets express both SGLT1 (encoded by *Slc5a1*) and SGLT2 (*Slc5a2*), SGLT1 is expressed at much higher levels than SGLT2 but still only at  $\sim$ 1% of levels found in the kidney (Figure S3C). In mouse  $\alpha$  cells, SGLT1 (*Slc5a1*) is expressed at very low levels ( $\sim$ 1%) compared with GLUT1 (*Slc2a1*) and GLUT3 (*Slc2a3*) (DiGruccio et al., 2016), and their contribution to glucose uptake is therefore likely to be negligible. Despite the low expression in mouse  $\alpha$  cells, the SGLTs nevertheless result in glucose-dependent  $Na^+$  uptake. We demonstrated this using the non-metabolized SGLT substrate  $\alpha$ -methyl-D-glucopyranoside ( $\alpha$ MDG) (Wright et al., 2011). As shown in Figures 4F and 4G, application of  $\alpha$ MDG increased  $[Na^+]_i$  in  $\alpha$  cells and this effect was almost fully prevented by the SGLT inhibitor phlorizin (Wright et al., 2011).

### SGLT-Mediated $Na^+$ Uptake Leads to Intracellular Acidification and Reduced ATP Production in the Hyperglycemic $\alpha$ Cell

We established a tissue culture protocol to test the effects of high glucose and  $Na^+$  uptake on  $\alpha$  cell function. Briefly, isolated wild-type islets were cultured for 48 hr at 5, 11–12 ( $\sim$ 11), or 20 mM glucose (Figure 5A). We found that culturing islets at  $\sim$ 11 mM glucose was optimal for both glucose-regulated glucagon and insulin secretion. Thus, we used  $\sim$ 11 mM glucose as the “normoglycemic” CTL. This glucose concentration is in fact close to the fed plasma glucose levels in CTL mice (Figures S1A and S1B; see also <https://phenome.jax.org/measures/32301>) and similar to that found in Fh1 $\beta$ KO mice before hyperglycemia and the defects of glucagon secretion developed (Figures 1A, S1A, and S1B).

We confirmed that culture in high glucose (20 mM) for 24 hr resulted in 2SC staining of peripheral islet cells that was not observed when islets were cultured at 5 mM glucose (Figure S4A).

Culture for 48 hr at 20 mM glucose led to intracellular acidification of  $\alpha$  cells compared with  $\alpha$  cells in islets cultured at 11 mM glucose. Quantitatively, this effect was similar to the acidification observed in  $\alpha$  cells in acutely isolated islets from hyperglycemic Fh1 $\beta$ KO mice compared with normoglycemic CTLs (compare Figures 4A and 5B). Importantly, the effect of high glucose culture was almost fully prevented when the SGLT inhibitor phlorizin was included in the culture medium (Figure 5B). “Hyperglycemia” *in vitro* did not result in acidification of the  $\beta$  cells but rather increased  $pH_i$  in these cells. This effect was not affected by phlorizin (Figure S5A), suggesting that different mechanisms control  $pH_i$  in  $\alpha$  and  $\beta$  cells.

We investigated the impact of high glucose culture on the cytoplasmic ATP/ADP ratio (ATP/ADP<sub>c</sub>). A glucose-induced increase

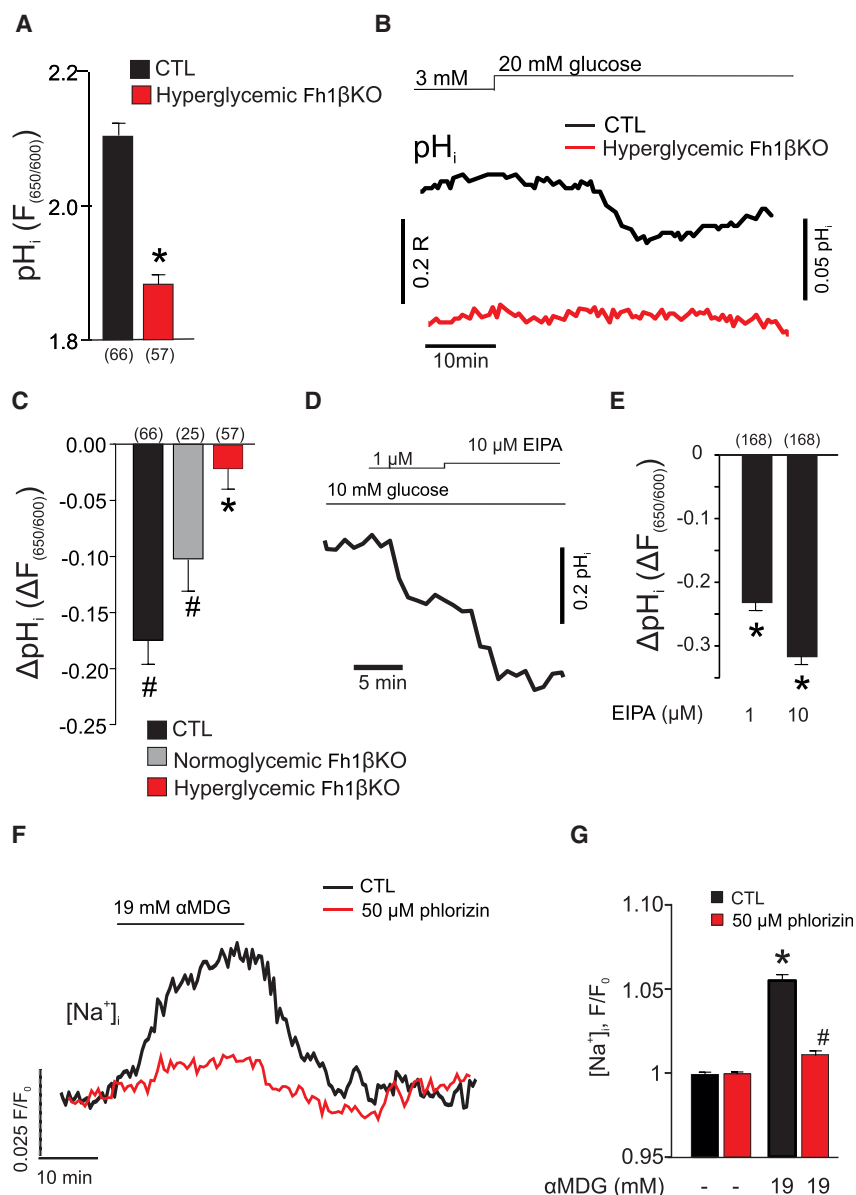

**Figure 4. Hyperglycemia Results in Intracellular Acidification of  $\alpha$  Cells**

(A) Histogram summarizing basal  $\alpha$  cell intracellular pH ( $pH_i$ ) measured using the pH indicator sem-naphthorhodafuor (SNARF) in  $\alpha$  cells in islets from CTL (black) and hyperglycemic Fh1 $\beta$ KO (red) mice. Number of cells indicated below the respective bars in the histogram. \* $p < 0.05$  versus CTL.

(B)  $pH_i$  measured in  $\alpha$  cells in islets from CTL (black) and hyperglycemic Fh1 $\beta$ KO (red) mice at 3 mM and 20 mM glucose. The traces have been offset to reflect the true difference in fluorescence ratios ( $F_{650/550}$ ) between CTL and Fh1 $\beta$ KO  $\alpha$  cells. Measurements were performed in acutely isolated intact islets.

(C) Net effect of 20 mM glucose on  $pH_i$  ( $\Delta F_{650/550}$ ) in  $\alpha$  cells from CTL (black) and nearly normoglycemic (gray) or hyperglycemic (red) Fh1 $\beta$ KO mice. Number of cells (n) indicated above the respective bars in the histogram. \* $p < 0.05$  versus CTL; # $p < 0.05$  versus basal (at 3 mM glucose).

(D) Dose-dependent acidification of wild-type  $\alpha$  cells in response to ethyl-isopropyl amiloride (EIPA) measured using the pH indicator SNARF.

(E) Histogram summarizing the effect of EIPA on  $\alpha$  cell  $pH_i$  in wild-type islets. Number of cells indicated above the respective bars in the histogram. \* $p < 0.05$  versus basal (no EIPA).

(F) Effect of the non-metabolizable glucose analogue  $\alpha$ -methyl-D-glucopyranoside ( $\alpha$ MDG) on cytoplasmic  $Na^+$  ( $[Na^+]_i$ ) in wild-type  $\alpha$  cells in the absence (black) and the presence (red) of phlorizin. Glucose (1 mM) was present throughout.  $[Na^+]_i$  was measured using Sodium Green. Fluorescence (F) values have been normalized to that at 1 mM glucose ( $F_0$ ).

(G) Effect of  $\alpha$ MDG on  $[Na^+]_i$  in the absence (black) and presence (red) of phlorizin in wild-type islets, as indicated. Data in (A) and (B) normalized to Sodium Green fluorescence under basal conditions (1 mM glucose; n = 59 cells) \* $p < 0.05$  versus 1 mM glucose; # $p < 0.05$  versus  $\alpha$ MDG in the absence of phlorizin.

Data are presented as mean values  $\pm$ SEM of indicated number of experiments (n). In (B), (D), and (F), representative single-cell traces have been selected for display. See also Figures S2 and S3.

in ATP/ADP<sub>c</sub> underlies the reduction of  $\alpha$  cell  $K_{ATP}$  channel activity proposed to culminate in inhibition of glucagon secretion (see schematic in Figure S7). This would account for the reduced  $\alpha$  cell  $[Ca^{2+}]_i$  oscillatory activity in hyperglycemic Fh1 $\beta$ KO mice and the stimulation by high glucose/tolbutamide. In islets cultured at 11 mM glucose, raising the glucose concentration from 1 to 20 mM (after a pre-incubation period of  $\sim$ 20 min at 1 mM glucose) led to an increase in ATP/ADP<sub>c</sub> (Figures 5C and 5D). However, in islets cultured at 20 mM glucose, acutely elevating glucose from 1 to 20 mM produced a much smaller increase in ATP/ADP<sub>c</sub>. This effect of hyperglycemia was prevented in the presence of phlorizin and glucose remained capable of increasing ATP/ADP<sub>c</sub> even when islets were cultured at 20 mM glucose with phlorizin.

Finally, we examined the impact of high glucose culture and intracellular acidification on glucagon secretion. Islets cultured

at 12 mM glucose responded to an elevation of glucose from 1 to 20 mM glucose with inhibition of glucagon secretion (Figure 5E). However, following culture of islets at 20 mM glucose, glucagon secretion measured at 1 mM glucose was reduced by 50% compared with that seen in islets cultured at 12 mM glucose. Furthermore, increasing the glucose concentration stimulated rather than inhibited glucagon secretion (echoing what is observed in Fh1 $\beta$ KO islets from hyperglycemic mice; Figure S1D). Both these effects of high glucose culture were reversed by phlorizin. In contrast, the SGLT2 inhibitor dapagliflozin did not restore normal glucose regulation in high glucose-cultured islets (not shown), in agreement with the low expression of *Slc5a2* in mouse islets (Figure S3C).

The effects of high glucose incubation were also studied in human islets following culture at 5 or 20 mM glucose for 24 hr. Although islets cultured at 5 mM (normoglycemia in humans)

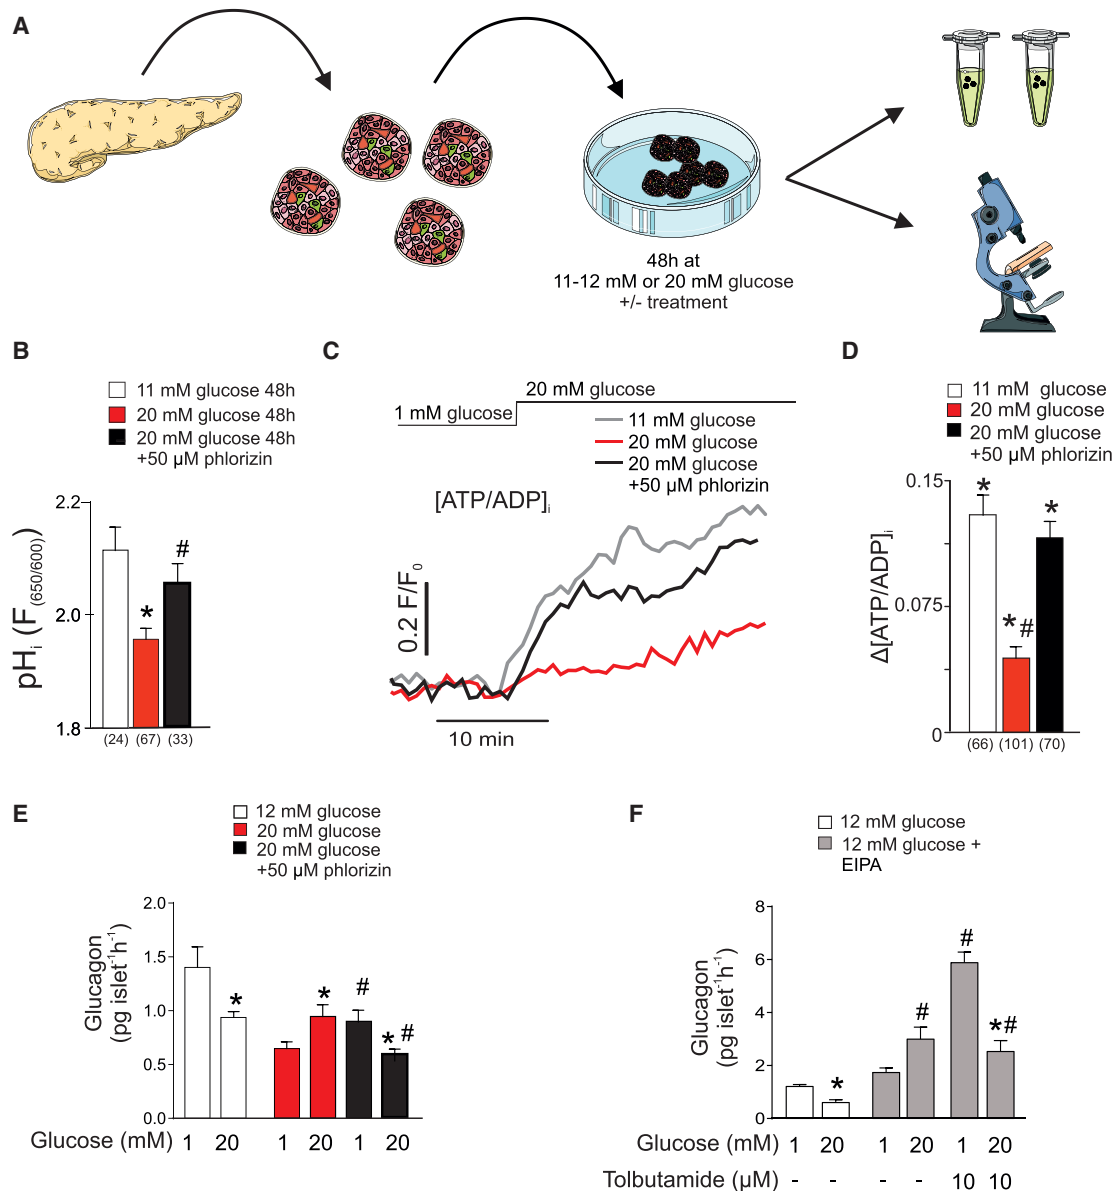

**Figure 5. SGLT-Mediated Na<sup>+</sup> Uptake Leads to Intracellular Acidification and Reduced ATP Production in the Hyperglycemic  $\alpha$  Cell**

(A) Schematic of *ex vivo* experiments. Islets are isolated from mouse pancreas and incubated in 11–12 or 20 mM glucose for 48 hr. These concentrations approximate to fed plasma glucose levels before and after hyperglycemia develops in Fh1 $\beta$ KO mice (see [Figures S1A](#) and [S1B](#)). Figure was made using Servier medical ART.

(B) Histogram summarizing basal  $pH_i$  measured using the pH indicator SNARF in  $\alpha$  cells from wild-type islets incubated for 48 hr at 11 mM or 20 mM glucose, or 20 mM glucose plus 50  $\mu$ M phlorizin. Number of cells (n) indicated below the respective bars in the histogram; \* $p < 0.05$  versus 11 mM glucose. # $p < 0.05$  versus 20 mM glucose.

(C) Cytoplasmic ATP/ADP ratio at 1 and 20 mM glucose (indicated above recording) in  $\alpha$  cells from wild-type islets cultured for 48 hr at 11 mM or 20 mM glucose, or 20 mM glucose plus 50  $\mu$ M phlorizin.

(D) Histogram summarizing the net effect of glucose on the cytoplasmic ATP/ADP ratio ( $\Delta[ATP/ADP]_i$ ) in  $\alpha$  cells from wild-type islets cultured at 11 or 20 mM glucose in the absence or presence of 50  $\mu$ M phlorizin as indicated. \* $p < 0.05$  versus 1 mM glucose; # $p < 0.05$  versus 20 mM glucose in islets cultured at 11 mM glucose.

(E) Glucagon secretion measured at 1 or 20 mM glucose in wild-type islets cultured for 48 hr at 12 mM, 20 mM glucose, or 20 mM glucose plus 50  $\mu$ M phlorizin as indicated. \* $p < 0.05$  versus 1 mM glucose in respective group; # $p < 0.05$  versus 20 mM glucose in islets cultured at 20 mM glucose in the absence of phlorizin (n = 8 experiments using islets from six mice).

(F) As in (E) using wild-type islets that were cultured for 48 hr at 12 mM glucose alone (white bars) or in the presence of 10  $\mu$ M NHE inhibitor EIPA (gray bars) in the absence or presence of 10  $\mu$ M tolbutamide as indicated. \* $p < 0.05$  versus 1 mM glucose in respective group; # $p < 0.05$  versus 20 mM glucose in islets cultured in the absence of EIPA; ## $p < 0.05$  versus 1 mM glucose EIPA-incubated islets in the absence of tolbutamide (n = 3–8 experiments using islets from five mice). Data are presented as mean values  $\pm$ SEM of indicated number of experiments (n). Traces in (C) represent average response in all cells. See also [Figure S4](#).



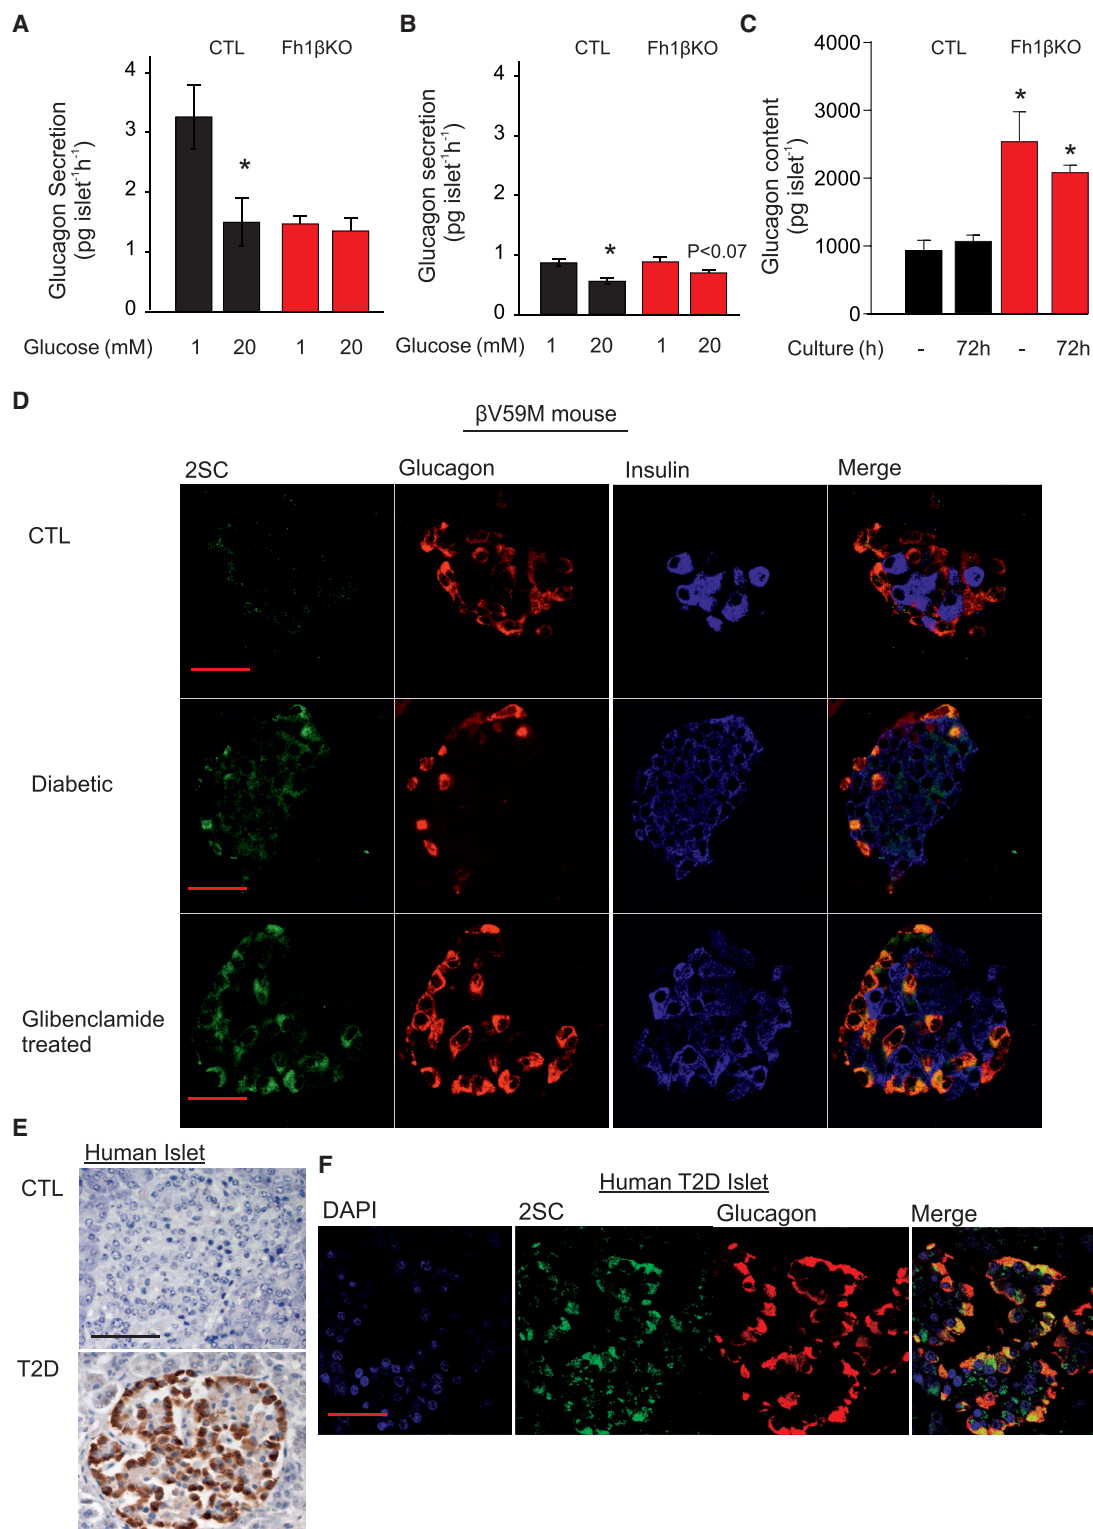

### Figure 6. Protein Succination Persists after Restoration of Normoglycemia

(A) Glucagon secretion at 1 and 20 mM glucose in acutely isolated islets from CTL and hyperglycemic Fh1βKO mice. \*p < 0.05 versus 1 mM glucose (n = 9 experiments using islets from four mice of each genotype).

(B) As in (A) but after 72 hr of culture at 12 mM glucose. \*p < 0.05 versus 1 mM glucose (n = 9 experiments for each genotype using islets from four CTL and four Fh1βKO mice).

(legend continued on next page)

responded to high glucose with 40%–60% suppression of glucagon secretion, no suppression of glucagon secretion by elevated glucose was detected in islets cultured at 20 mM glucose (Figure S4B).

In mouse islets cultured at 20 mM glucose for 48 hr, insulin secretion subsequently measured at 1 mM glucose was not affected, but the response to 20 mM glucose increased by >700% compared with islets cultured at 12 mM glucose (Figure S5B). Phlorizin did not affect insulin secretion (echoing the lack of effects on pH<sub>i</sub>), and it is consequently unlikely that the effects on glucagon secretion are secondary to changes of insulin secretion.

The capacity of phlorizin to counteract the adverse effects of chronic exposure to high glucose on glucagon secretion was not simply due to inhibition of  $\alpha$  cell electrical activity: in  $\alpha$  cells exposed to 20 mM glucose, there was no effect on the interspike membrane potential, the peak potential of the action potential, and action potential frequency (Figures S4C and S4D).

We considered whether intracellular acidification is enough to cause dysregulation of glucagon secretion. We incubated islets for 48 hr at 12 mM glucose in the absence or presence of the NHE inhibitor EIPA (10  $\mu$ M). Although islets cultured at 12 mM glucose alone responded to a subsequent increase in glucose from 1 to 20 mM with inhibition of glucagon secretion, islets cultured in the presence of EIPA exhibited an inverted response and elevation of glucose stimulated glucagon secretion (Figure 5F), echoing what is seen in Fh1 $\beta$ KO islets and in wild-type islets after high glucose culture (Figures S1D and 5E, respectively). We examined whether this might be due to increased K<sub>ATP</sub> channel activity. Indeed, treatment of islets with 10  $\mu$ M tolbutamide increased glucagon secretion at 1 mM and restored normal glucose regulation of glucagon secretion by high glucose in EIPA-treated islets (Figure 5F). Effects similar to those produced by EIPA on glucagon secretion were obtained during long-term exposure to D-glyceraldehyde (Figure S4F), which also produces intracellular acidification (Figures S4D and S4E).

### Reduction in Hyperglycemia Rescues Glucagon Secretion, but Not Succination

If the dysregulation of glucagon secretion in diabetic Fh1 $\beta$ KO is caused by hyperglycemia, then it should be possible to reverse the secretion defect simply by culturing the islets at normal glucose. Glucagon secretion in acutely isolated islets from hyperglycemic Fh1 $\beta$ KO mice was only ~40% of that in CTL islets and was unaffected by glucose, unlike what was seen in CTL islets (Figure 6A). Culture alone reduced glucagon secretion in CTL islets by >70% compared with acutely isolated islets, but residual glucagon secretion remained inhibited when glucose was increased from 1 to 20 mM (Figure 6B). There was a tendency toward restoration of normal glucose regulation when Fh1 $\beta$ KO islets from hyperglycemic mice were cultured at 12 mM glucose

for 72 hr (Figure 6B). Islets from Fh1 $\beta$ KO mice contain 200% more glucagon than non-diabetic CTLs, a difference that was only partially reversed after culturing the islets at 12 mM glucose (Figure 6C).

The dysregulation of glucagon secretion in  $\beta$ V59M mice is associated with strong 2SC labeling of the  $\alpha$  cell (Figure 3A). We used this mouse model to test the reversibility of protein succination (i.e., without genetic deletion of *Fh1* and strong 2SC labeling of the  $\beta$  cells). In normoglycemic  $\beta$ V59M mice (i.e., before tamoxifen treatment), no succination was seen in islet cells (Brereton et al., 2014). Following transgene induction and 14 days of hyperglycemia, stronger 2SC staining was observed in the  $\alpha$  cells than  $\beta$  cells. Normoglycemia was then restored by treatment with glibenclamide. However, even after 2 weeks of glibenclamide treatment, the  $\alpha$  cells remained 2SC positive (Figure 6D).

Persistent 2SC labeling of peripheral cells (likely to be  $\alpha$  cells) was also seen in islets from diabetic GK rats 10 days after plasma glucose levels had been normalized by bariatric (Roux-en-Y gastric bypass [RYGB]) surgery (Ramracheya et al., 2016); no 2SC labeling was observed in normoglycemic control (Wistar) rats (Figure S6A). Despite the normalization of plasma glucose, glucagon secretion at 1 mM glucose remained low in RYGB rats and 6 mM glucose was without a statistically significant inhibitory effect (Figure S6B).

Protein succination (2SC staining) was also seen in postmortem specimens of islets/pancreases from T2D patients and absent in islets from non-diabetic individuals (Figure 6E). In human T2D pancreatic islets (Table S1), 2SC staining appeared to be most prominent in  $\alpha$  cells (Figure 6F).

### Protein Succination Is Observed in Cardiomyocytes and Renal Tubular Cells from Hyperglycemic Fh1 $\beta$ KO Mice

Evidence for protein succination (2SC staining) was also observed in cardiomyocytes (Figure 7A) and renal tubular cells (Figure 7B) in hyperglycemic Fh1 $\beta$ KO mice, but not in non-diabetic littermate CTLs or young Fh1 $\beta$ KO mice. However, 2SC staining was scattered, suggesting that fumarate levels were only elevated in some cells.

2SC labeling of  $\alpha$  cells and renal tubular cells was not reversed by administration of phlorizin *in vivo* (400 mg/kg subcutaneously) to hyperglycemic Fh1 $\beta$ KO mice (plasma glucose: >20 mM) for 7 days (data not shown). This is consistent with the persistence of 2SC labeling in the GK rats and  $\beta$ V59M mice following normalization of plasma glucose.

## DISCUSSION

We demonstrate that chronic hyperglycemia results in changes in glucagon secretion similar to those that occur in diabetes. These changes, which occur in three hyperglycemic rodent

(C) Glucagon content in CTL and Fh1 $\beta$ KO islets either acutely isolated or after 72 hr of culture. \**p* < 0.05 versus CTL.

(D) Immunofluorescence for 2SC (green), glucagon (red), insulin (blue), and overlay (yellow) islets from CTL, hyperglycemic  $\beta$ V59M (diabetic), and normoglycemic  $\beta$ V59M mice (treated with glibenclamide). Note strong 2SC labeling of most glucagon-positive cells. Scale bar, 50  $\mu$ m.

(E) IHC for succination (2SC) in islets from non-diabetic (CTL) individuals and patients with type-2 diabetes (T2D). Scale bar, 50  $\mu$ m.

(F) Immunofluorescence for 2SC (green), glucagon (red), DAPI (blue), and overlay (yellow) in islets from patients diagnosed with T2D. Note strong 2SC labeling of most glucagon-positive cells. Scale bar, 50  $\mu$ m. Data in (E) and (F) are representative of six donors for both the non-diabetic (CTL) and T2D groups.

Data are presented as mean values  $\pm$  SEM of indicated number of experiments (n). See Table S1 for details on the donors.

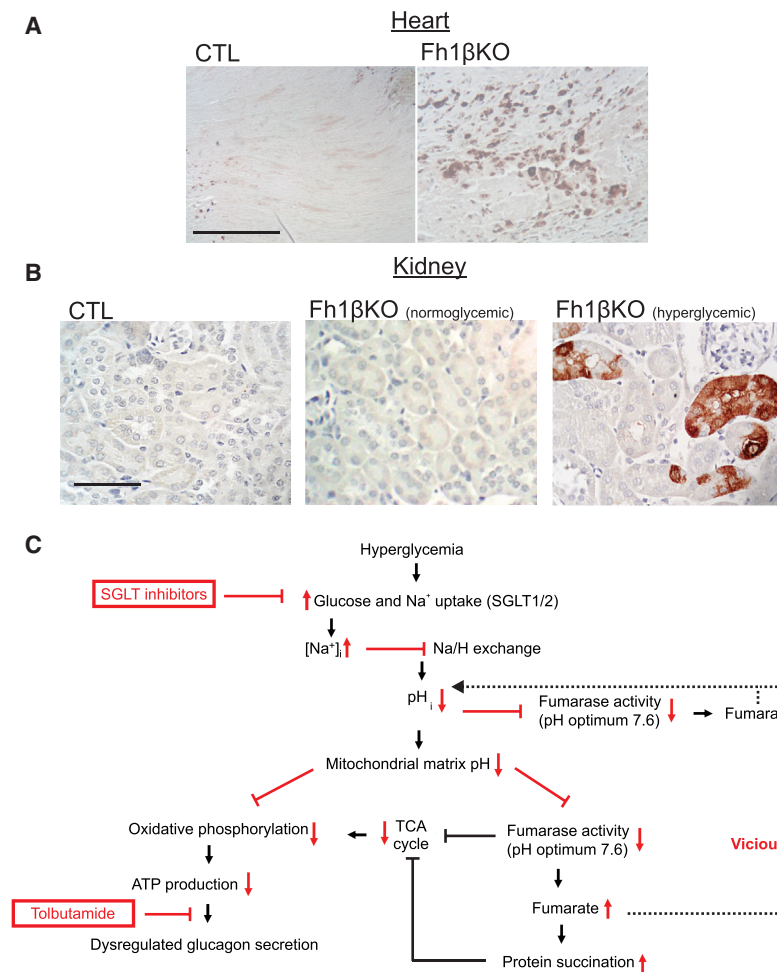

**Figure 7. Protein Succination in Renal Tubular Cells and Cardiomyocytes from Hyperglycemic Fh1 $\beta$ KO Mice**

(A) IHC for 2SC in CTL (left) and diabetic Fh1 $\beta$ KO (right) hearts showing staining in a subset of cells in diabetic animals but not in the non-diabetic CTLs. Scale bar, 50  $\mu$ m.

(B) As in (A) but showing sections of kidney in CTL (left) and normoglycemic (middle) or hyperglycemic (right) Fh1 $\beta$ KO mice as indicated.

(C) Schematic of the proposed relationship between hyperglycemia, impaired ATP production, and protein succination. The increased intracellular fumarate resulting from reduced activity of fumarase leads to protein succination. The sites of action of SGLT inhibitors and tolbutamide are indicated. Sections in (A) and (B) are representative of observations in >10 animals of both genotypes.

models of diabetes, manifest as a reduction of glucagon secretion at low glucose and stimulation, rather than inhibition, in response to high glucose. Similar disturbances are induced after culture of mouse and human islets under hyperglycemic conditions (20 mM glucose for 24–48 hr). Our findings are broadly consistent with the report that chronic glucose infusion in rats leads to moderate hyperglycemia (~15 mM) and hyperglucagonemia, despite stimulation of insulin secretion (Jamison et al., 2011).

### Intracellular Acidification Links Hyperglycemia to Impaired ATP Production

We propose a model that explains the dysregulation of glucagon secretion induced by hyperglycemia (Figure 7C). In this model, hyperglycemia results in increased  $\text{Na}^+$  uptake mediated by plasmalemmal SGLTs and a consequential increase in  $[\text{Na}^+]_i$ . The transmembrane  $\text{Na}^+$  gradient normally drives the uphill (i.e., against an electrochemical gradient) transport of several molecules in the cell, including  $\text{H}^+$ . An increase in  $[\text{Na}^+]_i$  will therefore interfere with the removal of  $\text{H}^+$  from the cytoplasm. This will cause intracellular acidification (i.e., an increased intracellular  $\text{H}^+$  concentration).

The critical role played by intracellular acidification as the causal factor leading to dysregulation of glucagon secretion is

underscored by the effects of EIPA. Addition of this NHE inhibitor leads to acidification and long-term treatment results in inverted glucose regulation of glucagon secretion (i.e., stimulation rather than inhibition) that can be corrected by low concentrations of tolbutamide.

In astrocytes, mild cytoplasmic acidification results in a marked reduction of intramitochondrial (matrix) pH ( $\text{pH}_m$ ) and inhibition of oxidative metabolism (Azarias et al., 2011). By analogy, we propose that the reduction of  $\text{pH}_i$  and  $\text{pH}_m$  induced by hyperglycemia will reduce the activity of both the cytoplasmic and mitochondrial forms of fumarase in  $\alpha$  cells, accounting for the

increased 2SC labeling. Because fumarate is an acid, reduced fumarase activity (via accumulation of fumarate) will result in further acidification, thus establishing a vicious cycle of progressive intracellular acidification. Fumarate can leave the mitochondria and be processed in the cytosol, as shown by the observation that the cytoplasmic form of fumarase (lacking the mitochondrial leading sequence) when re-introduced into *Fh1*-deficient cells “rescues” many of the consequences of deletion of *Fh1* (Adam et al., 2013, 2017; Ternette et al., 2013). We speculate that reverse operation of this mechanism could result in transport of cytoplasmic fumarate into the mitochondria and thus contribute to matrix acidification.

The metabolic consequences of reduced fumarase activity may be exacerbated by the effects of fumarate on other metabolic enzymes. For example, fumarate reduces the activity of other enzymes integral to both glycolysis and the TCA cycle, including glyceraldehyde-3-phosphate dehydrogenase (GAPDH) and acotinase (Blatnik et al., 2008; Ternette et al., 2013).

An alkaline  $\text{pH}_m$  is required for ATP production, which is energized by the downhill movement of  $\text{H}^+$  in an electrochemical gradient across the inner mitochondrial membrane. In  $\beta$  cells, alkalization of the mitochondrial matrix has been shown to correlate with mitochondrial ATP production (Akhmedov et al., 2010). When the mitochondrial matrix has undergone sufficient

acidification,  $H^+$  flux through ATP synthase becomes sufficiently reduced to impair ATP production.

The resultant fall in the ATP/ADP ratio results in increased  $K_{ATP}$  channel activity. Closure of the  $K_{ATP}$  channels is required for normal glucose regulation of glucagon secretion. This model explains why the effects of chronic hyperglycemia and inhibition of NHEs resemble those produced by inhibition of mitochondrial ATP synthesis by oligomycin or pharmacological activation of the  $K_{ATP}$  channels by diazoxide (Zhang et al., 2013). We found that a low concentration of the  $K_{ATP}$  channel inhibitor tolbutamide increased glucagon secretion at 1 mM glucose and restored normal glucose regulation (inhibition by high glucose) in islets from hyperglycemic Fh1 $\beta$ KO and  $\beta$ V5M mice, whereas it reduced glucagon secretion at low glucose in CTL mice. These observations are consistent with a bell-shaped relationship between  $K_{ATP}$  channel activity and glucagon secretion (see legend to Figure S7) and is also supported by our observation of reduced  $[Ca^{2+}]_i$  oscillatory activity in  $\alpha$  cells from diabetic Fh1 $\beta$ KO mice (Figures 3F and 3G).

Phlorizin also restores glucose-regulated glucagon secretion, but its mode of action is completely different to that of tolbutamide. Although tolbutamide corrects the “symptoms” of the defect, phlorizin corrects the cause. By inhibition of SGLT activity, phlorizin prevents  $Na^+$  uptake and intracellular acidification with resultant preservation of mitochondrial ATP production.

### Changes in Glucagon Content with Hyperglycemia and Loss of FH

Although the effects on glucagon secretion of deleting *Fh1* in  $\alpha$  and  $\beta$  cells are similar, the effects on glucagon content are not. Thus, although glucagon content is increased in Fh1 $\beta$ KO islets, it is decreased in Fh1 $\alpha$ KO islets. The reduction of glucagon content in the Fh1 $\alpha$ KO mice might be explained by the activation of cataplerosis to replenish the Krebs cycle intermediates following the complete genetic deletion of fumarase. Deamination of the amino acids that would otherwise be used for glucagon biosynthesis represents an obvious source, similar to the explanation for the >95% reduction of insulin content in  $\beta$  cells from Fh1 $\beta$ KO mice (Adam et al., 2017). The strong reduction of glucagon content (~90%) is probably a major factor explaining the 90% decrease in glucagon secretion in Fh1 $\alpha$ KO islets. Importantly, in Fh1 $\alpha$ KO islets, glucose tends to stimulate rather than inhibit glucagon secretion, echoing what is seen in the presence of the membrane-permeable exogenous dimethyl fumarate and in islets isolated from hyperglycemic mice. It is unclear precisely why glucagon content is increased in hyperglycemic Fh1 $\beta$ KO islets and in islets from human T2D donors. The simplest explanation is that the rate of secretion is reduced by 70%. Although fumarase activity is reduced sufficiently to result in 2SC staining, the  $\alpha$  cells in the hyperglycemic models may nevertheless retain sufficient enzyme activity not to deplete the amino acid pool needed for glucagon biosynthesis.

### Functional Significance of Protein Succination

It is interesting that  $\alpha$  cells in islets from patients with T2D showed strong protein succination. We also observed particularly strong 2SC labeling of  $\alpha$  cells in diabetic  $\beta$ V59M mice,

whereas staining of the  $\beta$  cells was much weaker. Thus, the impact of hyperglycemia in  $\alpha$  and  $\beta$  cells must be quite different and it is interesting that chronic hyperglycemia has opposite effects in  $\alpha$  (acidification) and  $\beta$  cells (alkalinization). Moreover, phlorizin corrected the dysregulation of glucagon secretion resulting from chronic hyperglycemia but did not affect the hypersecretion of insulin.

We also found that protein succination was poorly reversible; even after 2 weeks of glibenclamide treatment and normoglycemia,  $\alpha$  cells in  $\beta$ V59M showed protein succination. In this context it is worth remembering that protein succination is an irreversible chemical reaction. Thus, the lifespan of the succinated proteins must exceed 2 weeks. It is also possible that succination interferes with protein degradation and/or that hyperglycemia results in permanent dysregulation of metabolism as a consequence of hyperglycemic stress. The identity of all the succinated proteins remains unknown, but immunohistochemistry suggests it is extranuclear. Previous analyses of mouse and human islets indicate that mitochondrial proteins like DJ-1 (a cellular anti-oxidant response regulator) (Eberhard and Lammert, 2017; Jain et al., 2012) become succinated in hyperglycemic Fh1 $\beta$ KO islets and in diabetic human islets (Adam et al., 2017). The slow reversibility of succination may also explain why restoration of normoglycemia (by culture or by RYGB surgery) is associated with only partial recovery of normal glucose regulation of glucagon secretion.

### Protein Succination and Reduced Cardiac Mortality and Renal Failure in Diabetic Patients Treated with SGLT2 Inhibitors

Interestingly, protein succination was also observed in renal cells and cardiomyocytes, two cell types affected by secondary complications of diabetes. This suggests that the model can be extended to other SGLT-expressing cells and that hyperglycemia also leads to inhibition of fumarase in these cells. As in  $\alpha$  cells, reduced fumarase activity and intracellular acidification can be expected to compromise ATP production and thereby predispose to renal (Forbes, 2016) and cardiac failure (Brown et al., 2016). This model is supported by the recent observation that inhibition of SGLTs leads to reduced  $Na^+$  transport in the heart (Bertero et al., 2018). We emphasize that there is no increase in plasma fumarate levels in Fh1 $\beta$ KO mice. Thus, we can exclude any possibility that export of fumarate from the  $\beta$  cells may account for the 2SC labeling in the heart (which is unlikely also from quantitative considerations).

We emphasize that protein succination should be regarded as a biomarker of impaired mitochondrial metabolism rather than the cause. Given that both heart and kidneys express SGLT2 (although at 10-fold higher levels in kidneys), this model may give some insight into the dramatic reduction in cardiac mortality and kidney disease observed in diabetic patients treated with SGLT2 inhibitors (Wanner et al., 2016; Zinman et al., 2015). Explanations to date have focused on altered intermediary metabolism (Ferrannini, 2017; Lopaschuk and Verma, 2016). The “ $Na^+$  toxicity” hypothesis outlined here not only provides an alternative mode of action but also suggests a unifying molecular mechanism underlying the spectrum of diabetes-associated comorbidities. The hypothesis we propose posits that tissues that express SGLTs will be particularly sensitive to hyperglycemia.



## Limitations of Study

The concepts presented in these studies are based on animal experiments and it is now important to extend the model to human islets (and especially those from diabetic patients). Ultimately, it will also be important to translate these observations into improved therapy for diabetic patients. This will involve the demonstration that normal counter-regulatory glucagon secretion can be restored in diabetic patients by treatment with SGLT inhibitors or low-dose sulfonylurea. In addition, we acknowledge that, although protein succination, similar to that found in  $\alpha$  cells, is also observed in renal tubular cells and cardiac myocytes, the upstream molecular mechanism leading to reduced fumarase activity in these cells may be distinct from that in  $\alpha$  cells.

## STAR★METHODS

Detailed methods are provided in the online version of this paper and include the following:

- **KEY RESOURCES TABLE**
- **CONTACT FOR REAGENT AND RESOURCE SHARING**
- **EXPERIMENTAL MODEL AND SUBJECT DETAILS**
  - Animal Models: Mice
  - Animal Models: Rats
- **METHOD DETAILS**
  - Islet Isolation, Islet Culture and Hormone Secretion from Mouse Islets
  - Plasma Glucose Measurements
  - Plasma Fumarate Measurements
  - Glucose and Insulin Tolerance Test in Fh1 $\alpha$ KO Mice
  - Imaging of Cytosolic ATP/ADP, Ca<sup>2+</sup>, Na<sup>+</sup> and pH in Mouse  $\alpha$ -Cells
  - Immunohistochemistry and Immunofluorescence: Mouse, Rat and Human Pancreatic Tissue
  - Fumarase Activity Measurements
  - Sgit Expression Analysis
  - Electrophysiological Measurements
  - Human Islets and Ethics
  - Hormone Secretion from Human Islets
- **QUANTIFICATION AND STATISTICAL ANALYSIS**

## SUPPLEMENTAL INFORMATION

Supplemental Information includes seven figures and one table and can be found with this article online at <https://doi.org/10.1016/j.cmet.2018.10.003>.

## ACKNOWLEDGMENTS

This paper is a tribute to Dr. Patrick John Pollard, who was involved in the initial stages of this project and who died unexpectedly in June 2015. He was a passionate and gifted scientist, whom we remember fondly, and who made important contributions to many studies highlighting the importance of fumarase. We thank Professor Norma Frizzell and Dr. Anne Clark for the generous gifts of the 2SC antibody and assistance with microscopy, respectively. J.G.K. is supported by a Novo Nordisk postdoctoral fellowship run in partnership with the University of Oxford. A.H. was funded by a Diabetes UK PhD studentship. This work was supported by a Wellcome Trust Senior Investigator Award (095531), Wellcome Trust Strategic Award (884655) and program grant (089795), RD Lawrence Fellowship, the Swedish Research Council (2013-07107), and the Knut and Alice Wallenberg's Stiftelse.

## AUTHOR CONTRIBUTIONS

J.A., A.H., J.G.K., H.M., R.R., Q.Z., A.I.T., M.B., E.H., M.V.C., and P.S. collected the data. J.A., J.G.K., and P.R. conceived the project and planned the experiments. J.A., J.G.K., F.M.A., and P.R. wrote the manuscript. All authors analyzed the data and edited the manuscript.

## DECLARATION OF INTERESTS

The authors declare no competing interests.

Received: October 18, 2017

Revised: July 23, 2018

Accepted: October 13, 2018

Published: November 8, 2018

## REFERENCES

- Adam, J., Ramracheya, R., Chibalina, M.V., Ternette, N., Hamilton, A., Tarasov, A.I., Zhang, Q., Rebelato, E., Rorsman, N.J.G., Martin-Del-Rio, R., et al. (2017). Fumarate hydratase deletion in pancreatic beta cells leads to progressive diabetes. *Cell Rep.* **20**, 3135–3148.
- Adam, J., Yang, M., Bauerschmidt, C., Kitagawa, M., O'Flaherty, L., Maheswaran, P., Özkan, G., Sahgal, N., Baban, D., Kato, K., et al. (2013). A role for cytosolic fumarate hydratase in urea cycle metabolism and renal neoplasia. *Cell Rep.* **3**, 1440–1448.
- Akhmedov, D., Braun, M., Matak, C., Park, K.S., Pozzan, T., Schoonjans, K., Rorsman, P., Wollheim, C.B., and Wiederkehr, A. (2010). Mitochondrial matrix pH controls oxidative phosphorylation and metabolism-secretion coupling in INS-1E clonal beta cells. *FASEB J.* **24**, 4613–4626.
- Azarias, G., Perreten, H., Lengacher, S., Poburko, D., Demaurex, N., Magistretti, P.J., and Chatton, J.Y. (2011). Glutamate transport decreases mitochondrial pH and modulates oxidative metabolism in astrocytes. *J. Neurosci.* **31**, 3550–3559.
- Berg, J., Hung, Y.P., and Yellen, G. (2009). A genetically encoded fluorescent reporter of ATP: ADP ratio. *Nat. Methods* **6**, 161–166.
- Bernstein, L.H., and Everse, J. (1978). Studies on the mechanism of the malate dehydrogenase reaction. *J. Biol. Chem.* **253**, 8702–8707.
- Bertero, E., Prates Roma, L., Ameri, P., and Maack, C. (2018). Cardiac effects of SGLT2 inhibitors: the sodium hypothesis. *Cardiovasc. Res.* **114**, 12–18.
- Blatnik, M., Frizzell, N., Thorpe, S.R., and Baynes, J.W. (2008). Inactivation of glyceraldehyde-3-phosphate dehydrogenase by fumarate in diabetes: formation of S-(2-succinyl)cysteine, a novel chemical modification of protein and possible biomarker of mitochondrial stress. *Diabetes* **57**, 41–49.
- Blodgett, D.M., Nowosielska, A., Afik, S., Pechhold, S., Cura, A.J., Kennedy, N.J., Kim, S., Kucukural, A., Davis, R.J., Kent, S.C., et al. (2015). Novel observations from next-generation RNA sequencing of highly purified human adult and fetal islet cell subsets. *Diabetes* **64**, 3172–3181.
- Bonner, C., Kerr-Conte, J., Gmyr, V., Queniat, G., Moerman, E., Thevenet, J., Beaucamps, C., Delalleau, N., Popescu, I., Malaisse, W.J., et al. (2015). Inhibition of the glucose transporter SGLT2 with dapagliflozin in pancreatic alpha cells triggers glucagon secretion. *Nat. Med.* **21**, 512–517.
- Brereton, M.F., Iberl, M., Shimomura, K., Zhang, Q., Adriaenssens, A.E., Proks, P., Spiliotis, I.I., Dace, W., Mattis, K.K., Ramracheya, R., et al. (2014). Reversible changes in pancreatic islet structure and function produced by elevated blood glucose. *Nat. Commun.* **5**, 4639.
- Brown, D.A., Perry, J.B., Allen, M.E., Sabbah, H.N., Stauffer, B.L., Shaikh, S.R., Cleland, J.G., Colucci, W.S., Butler, J., Voors, A.A., et al. (2016). Expert consensus document: mitochondrial function as a therapeutic target in heart failure. *Nat. Rev. Cardiol.* **14**, 238–250.
- Casey, J.R., Grinstein, S., and Orlowski, J. (2010). Sensors and regulators of intracellular pH. *Nat. Rev. Mol. Cell Biol.* **11**, 50–61.
- Cryer, P.E. (1998). Managing diabetes: lessons from type 1 diabetes mellitus. *Diabet. Med.* **15** (Suppl 4), S8–S12.
- Cryer, P.E. (2002). Hypoglycaemia: the limiting factor in the glycaemic management of type I and type II diabetes. *Diabetologia* **45**, 937–948.

- Cryer, P.E. (2014). Glycemic goals in diabetes: trade-off between glycemic control and iatrogenic hypoglycemia. *Diabetes* 63, 2188–2195.
- DiGrucio, M.R., Mawla, A.M., Donaldson, C.J., Noguchi, G.M., Vaughan, J., Cowing-Zitron, C., van der Meulen, T., and Huisling, M.O. (2016). Comprehensive alpha, beta and delta cell transcriptomes reveal that ghrelin selectively activates delta cells and promotes somatostatin release from pancreatic islets. *Mol. Metab.* 5, 449–458.
- Dor, Y., Brown, J., Martinez, O.I., and Melton, D.A. (2004). Adult pancreatic  $\beta$ -cells are formed by self-duplication rather than stem-cell differentiation. *Nature* 429, 41.
- Dunning, B.E., Foley, J.E., and Ahren, B. (2005). Alpha cell function in health and disease: influence of glucagon-like peptide-1. *Diabetologia* 48, 1700–1713.
- Eberhard, D., and Lammert, E. (2017). The role of the antioxidant protein DJ-1 in type 2 diabetes mellitus. In *DJ-1/PARK7 Protein: Parkinson's Disease, Cancer and Oxidative Stress-Induced Diseases*, H. Ariga and S.M.M. Iguchi-Arigo, eds. (Springer), pp. 173–186.
- Ferrannini, E. (2017). Sodium-glucose co-transporters and their inhibition: clinical physiology. *Cell Metab.* 26, 27–38.
- Forbes, J.M. (2016). Mitochondria-power players in kidney function? *Trends Endocrinol. Metab.* 27, 441–442.
- Forbes, J.M., and Cooper, M.E. (2013). Mechanisms of diabetic complications. *Physiol. Rev.* 93, 137–188.
- Frier, B.M. (2009). The incidence and impact of hypoglycemia in type 1 and type 2 diabetes. *International Diabetes Monitor* 21, 210–218.
- Frizzell, N., Lima, M., and Baynes, J.W. (2011). Succination of proteins in diabetes. *Free Radic. Res.* 45, 101–109.
- Girard, C.A., Wunderlich, F.T., Shimomura, K., Collins, S., Kaizik, S., Proks, P., Abdulkader, F., Clark, A., Ball, V., Zubcevic, L., et al. (2009). Expression of an activating mutation in the gene encoding the K(ATP) channel subunit Kir6.2 in mouse pancreatic  $\beta$  cells recapitulates neonatal diabetes. *J. Clin. Invest.* 119, 80–90.
- Granhall, C., Park, H.B., Fakhrai-Rad, H., and Luthman, H. (2006). High-resolution quantitative trait locus analysis reveals multiple diabetes susceptibility loci mapped to intervals <800 kb in the species-conserved Niddm1 of the GK rat. *Genetics* 174, 1565–1572.
- Hamilton, A., Zhang, Q., Salehi, A., Willems, M., Knudsen, J.G., Ringgaard, A.K., Chapman, C.E., Gonzalez-Alvarez, A., Surdo, N.C., Zaccolo, M., et al. (2018). Adrenaline stimulates glucagon secretion by Tpc2-dependent  $\text{Ca}^{2+}$  mobilization from acidic stores in pancreatic  $\alpha$ -cells. *Diabetes* 67, 1128–1139.
- Herrera, P.L. (2000). Adult insulin- and glucagon-producing cells differentiate from two independent cell lineages. *Development* 127, 2317–2322.
- Jain, D., Jain, R., Eberhard, D., Eglinger, J., Bugliani, M., Piemonti, L., Marchetti, P., and Lammert, E. (2012). Age- and diet-dependent requirement of DJ-1 for glucose homeostasis in mice with implications for human type 2 diabetes. *J. Mol. Cell Biol.* 4, 221–230.
- Jamison, R.A., Stark, R., Dong, J., Yonemitsu, S., Zhang, D., Shulman, G.I., and Kibbey, R.G. (2011). Hyperglucagonemia precedes a decline in insulin secretion and causes hyperglycemia in chronically glucose-infused rats. *Am. J. Physiol. Endocrinol. Metab.* 301, E1174–E1183.
- Lai, J.C.K., and Cooper, A.J.L. (1986). Brain  $\alpha$ -ketoglutarate dehydrogenase complex: kinetic properties, regional distribution, and effects of inhibitors. *J. Neurochem.* 47, 1376–1386.
- Lopaschuk, G.D., and Verma, S. (2016). Empagliflozin's fuel hypothesis: not so soon. *Cell Metab.* 24, 200–202.
- Masereel, B., Pochet, L., and Laeckmann, D. (2003). An overview of inhibitors of  $\text{Na}^+/\text{H}^+$  exchanger. *Eur. J. Med. Chem.* 38, 547–554.
- Massey, V. (1953). Studies on fumarase. II. The effects of inorganic anions on fumarase activity. *Biochem. J.* 53, 67–71.
- Nagai, R., Brock, J.W., Blatnik, M., Baatz, J.E., Bethard, J., Walla, M.D., Thorpe, S.R., Baynes, J.W., and Frizzell, N. (2007). Succination of protein thiols during adipocyte maturation: a biomarker of mitochondrial stress. *J. Biol. Chem.* 282, 34219–34228.
- Parker, H.E., Adriaenssens, A., Rogers, G., Richards, P., Koepsell, H., Reimann, F., and Gribble, F.M. (2012). Predominant role of active versus facilitative glucose transport for glucagon-like peptide-1 secretion. *Diabetologia* 55, 2445–2455.
- Pollard, P.J., Spencer-Dene, B., Shukla, D., Howarth, K., Nye, E., El-Bahrawy, M., Deheragoda, M., Joannou, M., McDonald, S., Martin, A., et al. (2007). Targeted inactivation of fh1 causes proliferative renal cyst development and activation of the hypoxia pathway. *Cancer Cell* 11, 311–319.
- Pollard, P.J., Wortham, N.C., and Tomlinson, I.P. (2003). The TCA cycle and tumorigenesis: the examples of fumarate hydratase and succinate dehydrogenase. *Ann. Med.* 35, 632–639.
- R Development Core Team (2016). R: A Language and Environment for Statistical Computing (R Foundation for Statistical Computing).
- Ramracheya, R.D., McCulloch, L.J., Clark, A., Wiggins, D., Johannessen, H., Olsen, M.K., Cai, X., Zhao, C.M., Chen, D., and Rorsman, P. (2016). PYY-dependent restoration of impaired insulin and glucagon secretion in type 2 diabetes following Roux-En-Y gastric bypass surgery. *Cell Rep.* 15, 944–950.
- Rorsman, P., Ramracheya, R., Rorsman, N.J., and Zhang, Q. (2014). ATP-regulated potassium channels and voltage-gated calcium channels in pancreatic alpha and beta cells: similar functions but reciprocal effects on secretion. *Diabetologia* 57, 1749–1761.
- Skrivarhaug, T., Bangstad, H.J., Stene, L.C., Sandvik, L., Hanssen, K.F., and Joner, G. (2006). Long-term mortality in a nationwide cohort of childhood-onset type 1 diabetic patients in Norway. *Diabetologia* 49, 298–305.
- Spegel, P., Ekholm, E., Tuomi, T., Groop, L., Mulder, H., and Filipsson, K. (2013). Metabolite profiling reveals normal metabolic control in carriers of mutations in the glucokinase gene (MODY2). *Diabetes* 62, 653–661.
- Tarasov, A.I., Semplici, F., Ravier, M.A., Bellomo, E.A., Pullen, T.J., Gilon, P., Sekler, I., Rizzuto, R., and Rutter, G.A. (2012). The mitochondrial  $\text{Ca}^{2+}$  uniporter MCU is essential for glucose-induced ATP increases in pancreatic beta-cells. *PLoS One* 7, e39722.
- Ternette, N., Yang, M., Laroyia, M., Kitagawa, M., O'Flaherty, L., Wolhuter, K., Igarashi, K., Saito, K., Kato, K., Fischer, R., et al. (2013). Inhibition of mitochondrial aconitase by succination in fumarate hydratase deficiency. *Cell Rep.* 3, 689–700.
- Trube, G., Rorsman, P., and Ohno-Shosaku, T. (1986). Opposite effects of tolbutamide and diazoxide on the ATP-dependent  $\text{K}^+$  channel in mouse pancreatic beta-cells. *Pflugers Arch.* 407, 493–499.
- Unger, R.H., and Orci, L. (2010). Paracrinology of islets and the paracrinopathy of diabetes. *Proc. Natl. Acad. Sci. U S A* 107, 16009–16012.
- Vieira, E., Liu, Y.J., and Gylfe, E. (2004). Involvement of alpha1 and beta-adrenoceptors in adrenaline stimulation of the glucagon-secreting mouse alpha-cell. *Naunyn Schmiedeberg's Arch. Pharmacol.* 369, 179–183.
- Walker, J.N., Ramracheya, R., Zhang, Q., Johnson, P.R., Braun, M., and Rorsman, P. (2011). Regulation of glucagon secretion by glucose: paracrine, intrinsic or both? *Diabetes Obes. Metab.* 13 (Suppl 1), 95–105.
- Wanner, C., Inzucchi, S.E., and Zinman, B. (2016). Empagliflozin and progression of kidney disease in type 2 diabetes. *N. Engl. J. Med.* 375, 1801–1802.
- Willson, V.J.C., and Tipton, K.F. (1980). The effect of pH on the allosteric behaviour of Ox-brain  $\text{NAD}^+$ -dependent isocitrate dehydrogenase. *Eur. J. Biochem.* 109, 411–416.
- Wright, E.M., Loo, D.D., and Hirayama, B.A. (2011). Biology of human sodium glucose transporters. *Physiol. Rev.* 91, 733–794.
- Zhang, Q., Ramracheya, R., Lahmann, C., Tarasov, A., Bengtsson, M., Braha, O., Braun, M., Brereton, M., Collins, S., Galvanovskis, J., et al. (2013). Role of KATP channels in glucose-regulated glucagon secretion and impaired counterregulation in type 2 diabetes. *Cell Metab.* 18, 871–882.
- Zinman, B., Wanner, C., Lachin, J.M., Fitchett, D., Bluhmki, E., Hantel, S., Matthews, M., Devins, T., Johansen, O.E., Woerle, H.J., et al. (2015). Empagliflozin, cardiovascular outcomes, and mortality in type 2 diabetes. *N. Engl. J. Med.* 373, 2117–2128.

## STAR★METHODS

## KEY RESOURCES TABLE

| REAGENT or RESOURCE                                                                     | SOURCE                                                             | IDENTIFIER                                                                                                |
|-----------------------------------------------------------------------------------------|--------------------------------------------------------------------|-----------------------------------------------------------------------------------------------------------|
| <b>Antibodies</b>                                                                       |                                                                    |                                                                                                           |
| Guinea pig anti-Insulin                                                                 | in-house                                                           | N/A                                                                                                       |
| Mouse polyclonal anti-Glucagon                                                          | Sigma                                                              | G2654; RRID: AB_2313773                                                                                   |
| Rabbit anti-2SC                                                                         | N/A                                                                | Prof. N Frizzell                                                                                          |
| Rabbit anti-porcine FH                                                                  | Autogen Bioclear or Nordic Immunology                              | NEO54                                                                                                     |
| <b>Bacterial and Virus Strains</b>                                                      |                                                                    |                                                                                                           |
| Perceval                                                                                | <a href="#">Berg et al., 2009</a>                                  | Addgene Plasmid #21737                                                                                    |
| <b>Biological Samples</b>                                                               |                                                                    |                                                                                                           |
| Human Islets                                                                            | Diabetes Research & Wellness Foundation Human Islet Isolation unit | Oxford, UK                                                                                                |
| <b>Chemicals, Peptides, and Recombinant Proteins</b>                                    |                                                                    |                                                                                                           |
| Phlorizin                                                                               | Cayman                                                             | 11576                                                                                                     |
| Tolbutamide                                                                             | Sigma                                                              | T0891                                                                                                     |
| EIPA (Ethylisopropyl amiloride)                                                         | Tocris Bioscience                                                  | Cat. No. 3378                                                                                             |
| $\alpha$ MDG ( $\alpha$ -methyl-D-glucopyranoside)                                      | Sigma Aldrich                                                      | M 9376                                                                                                    |
| <b>Critical Commercial Assays</b>                                                       |                                                                    |                                                                                                           |
| Glucagon EURIA                                                                          | Euro diagnostica                                                   | RB310                                                                                                     |
| RAT - Insulin RIA                                                                       | Millipore                                                          | RIK-13                                                                                                    |
| MSD Mouse/Rat Insulin, Glucagon Kit                                                     | Mesoscale discovery                                                | K15145C                                                                                                   |
| <b>Experimental Models: Cell Lines</b>                                                  |                                                                    |                                                                                                           |
| $\alpha$ TC1-6 cell line                                                                | ATACC                                                              | CRL-2934; RRID: CVCL_8036                                                                                 |
| <b>Experimental Models: Organisms/Strains</b>                                           |                                                                    |                                                                                                           |
| Tg( <i>Ins2-Cre</i> ) <sup>23Herr</sup> Cre recombinase, <i>Rip2-Cre</i> <sup>+/-</sup> | <a href="#">Herrera, 2000</a>                                      | N/A                                                                                                       |
| C57BL/6J mice                                                                           | Jackson laboratories                                               | 000664 -C57BL/6J                                                                                          |
| <i>Glu-iCre</i> <sup>+/-</sup>                                                          | <a href="#">Parker et al., 2012</a>                                | N/A                                                                                                       |
| NMRI                                                                                    | Jackson laboratories                                               | 009682 - NMRI-Tbce<pmn>/J                                                                                 |
| Goto-Kakizaki ( <i>TohiCskCrijCr</i> ) GK rats                                          | <a href="#">Ramacheya et al., 2016</a>                             | N/A                                                                                                       |
| <i>Fh1</i> <sup>tm1Pjpt/fh</sup>                                                        | <a href="#">Pollard et al., 2007</a>                               | N/A                                                                                                       |
| $\beta$ Kir6.2-V59M mice                                                                | <a href="#">Brereton et al., 2014</a>                              | N/A                                                                                                       |
| <b>Software and Algorithms</b>                                                          |                                                                    |                                                                                                           |
| IGOR Pro                                                                                | Wavemetrics                                                        | <a href="https://www.wavemetrics.com/downloads/current">https://www.wavemetrics.com/downloads/current</a> |
| Fiji                                                                                    | ImageJ                                                             | <a href="https://imagej.net/Fiji/Downloads">https://imagej.net/Fiji/Downloads</a>                         |
| <b>Other</b>                                                                            |                                                                    |                                                                                                           |
| SNARF-5F 5-(and-6)-Carboxylic Acid                                                      | Thermo Fisher                                                      | S23922                                                                                                    |
| Sodium Green Tetraacetate, cell permeant - Special Packaging                            | Thermo Fisher                                                      | S6901                                                                                                     |
| Fluo-4, AM, cell permeant                                                               | Thermo Fisher                                                      | F14201                                                                                                    |

## CONTACT FOR REAGENT AND RESOURCE SHARING

Further information and requests for resources and reagents should be directed to and will be fulfilled by the Lead Contact, Patrik Rorsman ([patrik.rorsman@drl.ox.ac.uk](mailto:patrik.rorsman@drl.ox.ac.uk)).

## EXPERIMENTAL MODEL AND SUBJECT DETAILS

### Animal Models: Mice

All animal experiments were conducted in accordance with the UK Animals Scientific Procedures Act (1986) and University of Oxford local ethical guidelines. Animals were kept on a 12 hr light: dark cycle, at 22°C. The mice used were either  $Fh1^{tm1Pjpfll/fl}Rip2-Cre^{+/-}$  (designated Fh1 $\beta$ KO), which were generated originally by crossing  $Fh1^{tm1Pjpfll/fl}$  (Pollard et al., 2007) with  $Tg(Ins2-Cre)^{23Herr}$  Cre recombinase,  $Rip2-Cre^{+/-}$  (Herrera, 2000) (as described in Adam et al., 2017), or  $Fh1^{tm1Pjpfll/fl}Glu-iCre^{+/-}$  (designated Fh1 $\alpha$ KO), which were generated by crossing  $Fh1^{tm1Pjpfll/fl}$  (Pollard et al., 2007) with  $Glu-iCre^{+/-}$  (Parker et al., 2012). Mice had been backcrossed on a C57BL/6J background at least 5 times when the experiments commenced.  $Fh1$  was deleted specifically in either  $\beta$ - or  $\alpha$ -cells respectively in these strains and littermates were used as controls.

Details of  $\beta$ Kir6.2-V59M mice (that express a gain-of-function  $K_{ATP}$  channel mutation in the  $\beta$ -cells following tamoxifen induction) are as described previously (Breton et al., 2014). These mice were generated originally by crossing Kir6.2-V59M (Girard et al., 2009) with mice expressing a tamoxifen inducible rat insulin promoter II (RIPII-Cre-ERT mice) (Dor et al., 2004). Mice were on a mixed (C3H, C57BL/6, 129/sv) genetic background. Kir6.2-V59M expression was induced in pancreatic  $\beta$ -cells in mice at 12-14 weeks of age by a single subcutaneous injection of 0.4 ml of 20 mg/ml tamoxifen in corn oil (Sigma). Littermates were used as controls.

Some experiments were carried out with islets isolated from NMRI or C57BL/6J mice (referred to as wild-type) obtained from a commercial supplier.

### Animal Models: Rats

Experiments on rats were performed as described previously (Ramracheya et al., 2016). Briefly, adult male Wistar and Goto-Kakizaki (*Toh1CskCrljCr*) GK rats were used. The GK rats were divided into either Roux-Y-gastric bypass procedure (RYGB) or sham-operation groups.

Animals of both sexes were used for all islet experiments; neither have we observed nor has it been reported that there are sex differences at the islet level. Therefore, we found it best to include both sexes, and in these studies we have not observed any sex differences. We have previously reported, and discussed sex differences in the Fh1 $\beta$ KO mouse model (Adam et al., 2017). For all other *in vivo* experiments male mice were used.

## METHOD DETAILS

### Islet Isolation, Islet Culture and Hormone Secretion from Mouse Islets

Islets were isolated by collagenase or liberase digestion. After isolation, islets were transferred to RPMI-1640 supplemented with 5 mM glucose, 100 U/ml penicillin, 10  $\mu$ g/ml streptomycin (P/S) and 10% fetal calf serum (FCS). In most experiments they were kept in this medium at 37°C in a humidified atmosphere (5% CO<sub>2</sub>/95% air) for <2 hr prior to experiments. However, in some experiments, islets were cultured in RPMI-1640 (supplemented with 10% FCS and 1% P/S) containing either 5, 11-12 or 20 mM glucose, or 20 mM glucose to which was added either 50  $\mu$ M of the SGLT inhibitor phlorizin (dissolved in DMSO; final concentration: 0.1% v/v), or the NHE inhibitor ethylisopropyl amiloride (EIPA, dissolved in DMSO: 0.1% v/v) for 48 hr prior to the hormone release measurements (as indicated). Dimethyl fumarate was dissolved in DMSO (0.1% v/v). Control experiments were performed in the presence of the same concentration of DMSO.

In all cases, hormone secretion was measured from batches of 10-12 islets. Size-matched islets were hand-picked and washed twice in glucose-free RPMI-1640 (supplemented with 100 U/ml penicillin, 10  $\mu$ g/ml streptomycin and 10% FCS). They were pre-incubated for 1 hr in a humidified chamber at 37°C (5% CO<sub>2</sub>/95% air) in 300  $\mu$ l of Krebs-Ringer buffer (KRB) which contained the following (mM) 140 NaCl, 3.6 KCl, 2.6 CaCl<sub>2</sub>, 0.5 MgSO<sub>4</sub>·7H<sub>2</sub>O, 0.5 NaH<sub>2</sub>PO<sub>4</sub>, 2 NaHCO<sub>3</sub>, 5 HEPES and 2 mg/ml BSA (pH adjusted to 7.4 with 1 M NaOH) and 1 mM glucose. The pre-incubation buffer was discarded and the islets were stimulated for a further 1 h with the test conditions indicated. An aliquot of the supernatant was collected and stored at -20°C for quantification of either insulin or glucagon secretion by radioimmunoassay. The remaining supernatant was discarded and the islets were lysed in 100  $\mu$ l of ice-cold acid ethanol solution (containing ethanol, H<sub>2</sub>O and HCl in a ratio of 52:17:1) to release their hormone content. Lysates were immediately frozen at -20°C for later analysis. Insulin (Millipore) and glucagon (Euro-diagnostica) was determined by commercial radio-immunoassays following the manufacturer's protocols.

### Plasma Glucose Measurements

Fed blood glucose levels were determined with an Accucheck Aviva meter at approximately 9 am.

### Plasma Fumarate Measurements

Fumarate was extracted from mouse plasma and analyzed as described previously (Spegel et al., 2013). Plasma fumarate concentrations were calibrated against an external standard of Na<sub>2</sub>-fumarate.



### Glucose and Insulin Tolerance Test in Fh1 $\alpha$ KO Mice

In the glucose tolerance tests, male Fh1 $\alpha$ KO mice and control littermates were fasted for 6 hr from 8.30 am and fasting blood glucose was measured, the mice were then injected intraperitoneally with 2 g/kg body weight of D-glucose in PBS and blood glucose levels were measured 15, 30, 60 and 120 min post injection.

In the insulin tolerance tests, male Fh1 $\alpha$ KO mice and control littermates were fasted for 3-4 hr prior to the experiments. Fast-acting human insulin (0.75 U/kg Actrapid, Novo Nordisk) was injected intraperitoneally with a 25gauge needle at time zero and samples taken for plasma glucose measurements after 15, 30, 60 and 120 min post injection.

### Imaging of Cytosolic ATP/ADP, Ca<sup>2+</sup>, Na<sup>+</sup> and pH in Mouse $\alpha$ -Cells

For these experiments, the extracellular medium consisted of (mM) 140 NaCl, 4.6 KCl, 2.6 CaCl<sub>2</sub>, 1.2 MgCl<sub>2</sub>, 1 NaH<sub>2</sub>PO<sub>4</sub>, 5 NaHCO<sub>3</sub>, 10 HEPES, (pH 7.4, with NaOH) and (unless otherwise stated) 1 glucose. When extracellular Na<sup>+</sup> was lowered to 10 mM, NaCl was equimolarly replaced by N-methyl-D-glucamine. For measurements of [Na<sup>+</sup>]<sub>i</sub>, the membrane potential was held at  $\approx$ -70 mV by including the K<sub>ATP</sub> channel activator diazoxide (0.2 mM) in the superfusion medium. The bath was perfused at 60-200  $\mu$ l/min and the temperature kept at  $\sim$ 34°C.

Time-lapse imaging of ATP/ADP ratio in islets was performed using a Zeiss AxioZoom.V16 zoom microscope, and magnifications between 10x and 14x. Mouse islets were transduced with an adenovirus ( $3 \times 10^4$  infectious units per islet) delivering Perceval, a recombinant sensor of ATP/ADP based on circularly permuted YFP variant Venus (Berg et al., 2009). Perceval is pH-sensitive but the changes in pH<sub>i</sub> account for <10% of the glucose-induced changes in Perceval fluorescence (Tarasov et al., 2012). Groups of islets isolated from littermate control and Fh1 $\beta$ KO animals were imaged simultaneously 24 hr post-infection, with single-cell resolution. Time-lapse images were collected every 30 s. The  $\alpha$ -cells were identified by the ability of adrenaline to increase cAMP in cells infected with 'red downward cADDis' cAMP recombinant sensor delivered using a BacMam vector.

Parallel time-lapse imaging of [Ca<sup>2+</sup>]<sub>i</sub> and pH<sub>i</sub> in mouse islets was performed on an inverted Zeiss AxioVert 200 microscope equipped with Zeiss 510-META laser confocal scanning system, using 40x/1.3 objective. Cells that generate spontaneous [Ca<sup>2+</sup>]<sub>i</sub> oscillations at low glucose were taken to represent  $\alpha$ -cells. Mouse islets were loaded with 6  $\mu$ M of the Ca<sup>2+</sup> sensitive dye Fluo-4 for 90 min before being transferred to a separate solution containing 6  $\mu$ M of the pH-sensitive dye SNARF-5F for a further 50 min at room temperature and imaged using an open chamber at 34°C. The ratiometric dye SNARF-5F was excited at 543 nm and emission was collected at 650 nm and 600 nm, which corresponds to the emission maxima of the sensor at pH 9 and pH 6, respectively. Fluo-4 was excited at 488 nm and imaged at 530 nm. Images were collected at the frequency of 0.03 Hz. The absolute pH<sub>i</sub> change in Figure 4 was estimated using a high K<sup>+</sup> (140 mM)-nigericin (10  $\mu$ M)/valinomycin (5  $\mu$ M) calibration protocol (Tarasov et al., 2012).

Sodium Green time-lapse measurements of [Na<sup>+</sup>]<sub>i</sub> were performed in dispersed islet cells, on a Zeiss AxioZoom.V16 zoom microscope, using magnifications in the range 15x-20x.  $\alpha$ -cells were distinguished by the positive cAMP response to 10  $\mu$ M adrenaline (Vieira et al., 2004) (as described above). Islets were dispersed into a single-cell suspension, which was plated on 0.17 mm thick glass coverslips in 10  $\mu$ l droplets and left to attach for >2 hr. Multiple droplets, consisting of cells of different genotypes, were plated on the same coverslip and imaged simultaneously; thus enhancing the statistical power of comparisons. After 24 hr, cells were pre-loaded with 6  $\mu$ M of Sodium Green for 30 min and imaged at several locations throughout the coverslip simultaneously. Sodium Green was excited at 490 nm and emission was collected at 515 nm. Red downward cADDis was excited at 572 nm and the emission was collected at 629 nm. Image sequences were analyzed (registration, background subtraction, ROI intensity vs time analysis) using open-source FIJI software (<http://fiji.sc/Fiji>).

Singular time-lapse recordings of [Ca<sup>2+</sup>]<sub>i</sub> were performed in intact freshly isolated mouse islets loaded with 6  $\mu$ M Fluo-4 at room temperature (Molecular Probes) for 90 min and imaged using a Zeiss AxioVert 200 microscope equipped with Zeiss 510-META laser confocal scanning system, using 40x/1.3 objective. A 488 nm argon laser (3% intensity) was used to excite Fluo-4 and emission was collected at 530 nm, using 512x512 frame scanning mode with a pixel dwell time of 6  $\mu$ s and a bit depth of 8-bit. Images were acquired every 3.93 s ( $\sim$ 0.25 Hz).  $\alpha$ -Cells were identified by an increase in [Ca<sup>2+</sup>]<sub>i</sub> in response to adrenaline (5  $\mu$ M) (Hamilton et al., 2018). For the singular [Ca<sup>2+</sup>]<sub>i</sub> recordings, the numerical data was analysed using IgorPro package (Wavemetrics), each trace was normalised (F/F<sub>0</sub>) and baseline/bleach corrected. Partial area under the curve (pAUC) was then calculated by splitting each trace into 30 s intervals and computing AUC for each interval using trapezoidal integration. pAUC points falling within a given region (e.g. 1 mM glucose) for each trace were averaged, the mean of these values across the  $\alpha$ -cell population was then calculated to generate the final pAUC value (displayed in the column plot). Statistical analysis was performed using SPSS. Mann-Whitney U-test or Wilcoxon's paired test were used to compute the significance of difference between independent and dependent samples, respectively. Differences with  $p < 0.05$  were considered significant.

### Immunohistochemistry and Immunofluorescence: Mouse, Rat and Human Pancreatic Tissue

Mouse and human pancreases were fixed in 10% neutral-buffered formalin, dehydrated and processed for paraffin wax embedding and sectioning (3  $\mu$ m). Immunohistochemistry (IHC) was carried out using the EnVision kit (Dako) as per the manufacturer's protocol with the following antibodies: FH, insulin, glucagon and 2SC (Nagai et al., 2007).

Immunofluorescence was performed using the same antibodies as for IHC with Alexa Fluor<sup>®</sup> secondary antibodies using a Zeiss LSM510 META confocal imaging system.

Both staining and analysis of murine and human pancreatic sections were conducted blinded. Sections from human subjects were scored by 3 independent observers.

### Fumarase Activity Measurements

Fumarase activity was determined by measuring the rate of NADH production from the coupled reaction converting fumarate to oxaloacetate *via* malate dehydrogenase (MDH) as described previously (Massey, 1953). pH-dependent changes in fumarase were measured on 0.05 U of porcine fumarase by adjusting the pH of the HEPES buffer using KOH. A 5  $\mu$ l sample was loaded in a 96-well plate, 195  $\mu$ l assay buffer (50 mM Hepes-KOH, 1 mM  $\text{KH}_2\text{PO}_4$ , 1 mM  $\text{MgCl}_2$ , 10 mM  $\text{NAD}^+$ , 10 mM L-glutamate, 6.75 U malate dehydrogenase, 2.5 U glutamate-oxaloacetate transaminase) was added and the plate was incubated for 10 min at 37°C. Following the incubation, 10  $\mu$ l of 30 mM fumarate (Sigma) was added and the appearance of NADH was measured every 30 s at 37°C by excitation/emission at 360/450 nm (Enspire, 2300 Multilabel Reader, Perkin Elmer). NADH concentration was determined from a standard curve. All samples were run in triplicate and normalized to protein content, as measured by bicinchoninic acid protein assay.

### Sglt Expression Analysis

Total RNA from mouse tissues was isolated using a combination of TRIzol and PureLink RNA Mini Kit. DNase treatment was included to eliminate DNA contamination. cDNA was synthesized using the High Capacity RNA-to-cDNA kit. Real-time qPCR was performed using SYBR Green detection and gene specific QuantiTect Primer Assay. Relative expression was calculated as  $2^{-\Delta\Delta\text{CT}}$ . *Actb* and *Ppia* were used for normalization.

### Electrophysiological Measurements

Electrical activity measurements were conducted as previously described (Zhang et al., 2013). Briefly, membrane potential of islet cells was monitored in islet cells within freshly isolated intact mouse islets using perforated patch whole-cell technique carried out at 32–34°C. The recording was performed using an EPC-10 patch-clamping amplifier (HEKA Electronics, Lambrecht/Pfalz, Germany) and Pulse (version 8.80) software. Patch pipettes were pulled from borosilicate glass with the resistances of  $\sim$ 5 MW when filled with the pipette solutions. The pipette solution contains (mM): 76  $\text{K}_2\text{SO}_4$ , 10 NaCl, 10 KCl, 1  $\text{MgCl}_2$  and 5 HEPES (pH 7.35 with KOH) and the extracellular solution consists of (mM): 140 NaCl, 3.6 KCl, 0.5  $\text{MgSO}_4$ , 1.5  $\text{CaCl}_2$ , 0.5  $\text{NaH}_2\text{PO}_4$ , 5  $\text{NaHCO}_3$  and 10 HEPES (pH 7.4 with NaOH). Glucose concentrations are as indicated in the figure. Amphotericin B (0.24 mg/ml) was included in the pipette solution for membrane perforation. Data analysis was performed using ClampFit (Version 9.2.0.11, Molecular Devices).

### Human Islets and Ethics

Human pancreatic islets were isolated, with ethical approval and clinical consent, at the Diabetes Research and Wellness Foundation Human islet Isolation Facility (Oxford). For histology, pancreatic tissue blocks from the Oxford Human Pancreas Repository were used (licensed by the Human Tissue Authority).

### Hormone Secretion from Human Islets

Human islets from three donors (2 female and 1 male; age:  $52.33 \pm 0.8$ ; BMI:  $30 \pm 2$ ; HbA1c: 5.6–5.7%) were cultured in RPMI-1640 (supplemented with 10% FCS and 1% penicillin and streptomycin) containing 5 mM glucose. Secretion experiments were performed as described above.

## QUANTIFICATION AND STATISTICAL ANALYSIS

All data are presented as mean  $\pm$  standard error of mean (SEM) of the indicated number of experiments (n). All statistical tests were conducted in Prism5 (GraphPad Software, San Diego, CA). For two groupings, a t-test was conducted with the appropriate *post-hoc* test. For more than two groupings, a one-way ANOVA was performed. If the data passed normality criteria (D'Agostino's test of normality and Bartlett's test of equal variances) a parametric test was conducted with the appropriate *post-hoc* test (Student Newman-Keuls). If the normality criteria were not met, a Kruskal–Wallis test with Dunn's multiple comparison test was conducted. Levels of significance are given in the figures for the indicated comparisons.

For analysis of imaging data, statistical significance of the differences between paired or unpaired samples were tested using Friedman or Kruskal–Wallis tests, respectively, with Nemenyi *post-hoc* analysis, as implemented in R package (R Development Core Team, 2016).

**Cell Metabolism, Volume 29**

**Supplemental Information**

**Dysregulation of Glucagon Secretion**

**by Hyperglycemia-Induced Sodium-Dependent**

**Reduction of ATP Production**

**Jakob G. Knudsen, Alexander Hamilton, Reshma Ramracheya, Andrei I. Tarasov, Melissa Brereton, Elizabeth Haythorne, Margarita V. Chibalina, Peter Spéjel, Hindrik Mulder, Quan Zhang, Frances M. Ashcroft, Julie Adam, and Patrik Rorsman**

Figure S1

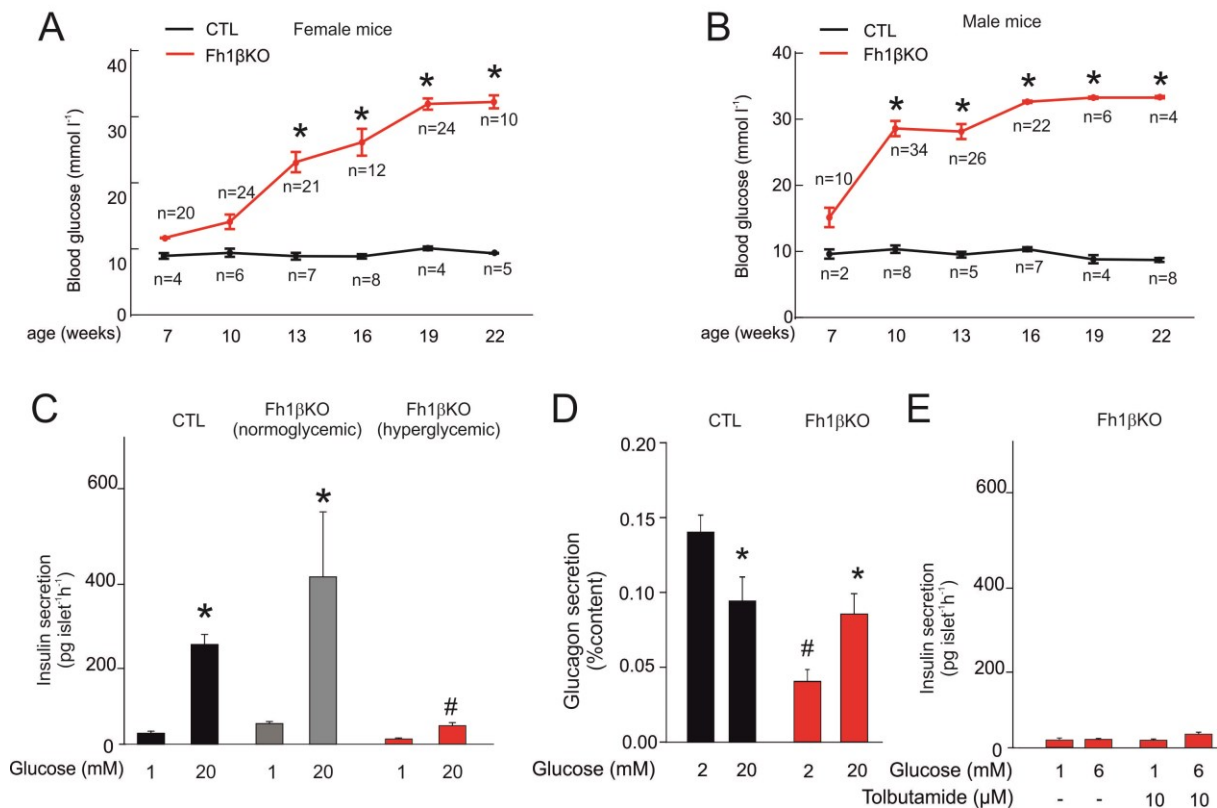

**Figure S1. Progression of diabetes in Fh1βKO mice, Related to figure 1.**

(A-B) Blood glucose in female (A) and male (B) Fh1βKO mice measured in 3-week intervals. \* $P < 0.05$  vs control. n = number of mice per time point.

(C) Insulin secretion in isolated islets from control (CTL; black), normoglycemic (plasma glucose:  $< 12$  mM; grey) and diabetic (plasma glucose:  $> 20$  mM; red) Fh1βKO mice at 1 and 20 mM glucose. \* $P < 0.05$  vs 1 mM glucose; # $P < 0.05$  vs 20 mM glucose in normoglycemic Fh1βKO islets (n=8-9 experiments using islets from 12 mice).

(D) Glucagon secretion in islets from hyperglycemic Fh1βKO mice (red) and age-matched control mice (CTL; black) at 2 and 20 mM glucose. Data are based on 6 experiments using islets from 3 mice for each genotype. \* $P < 0.05$  vs 2 mM glucose; # $P < 0.05$  vs 2 mM glucose CTL.

(E) Insulin secretion in islets from hyperglycemic Fh1βKO mice (red) in response to 1 or 6 mM glucose with or without 10 μM tolbutamide (n=6 experiments using islets from 6 mice).

Data are mean values  $\pm$  SEM.



# Figure S2

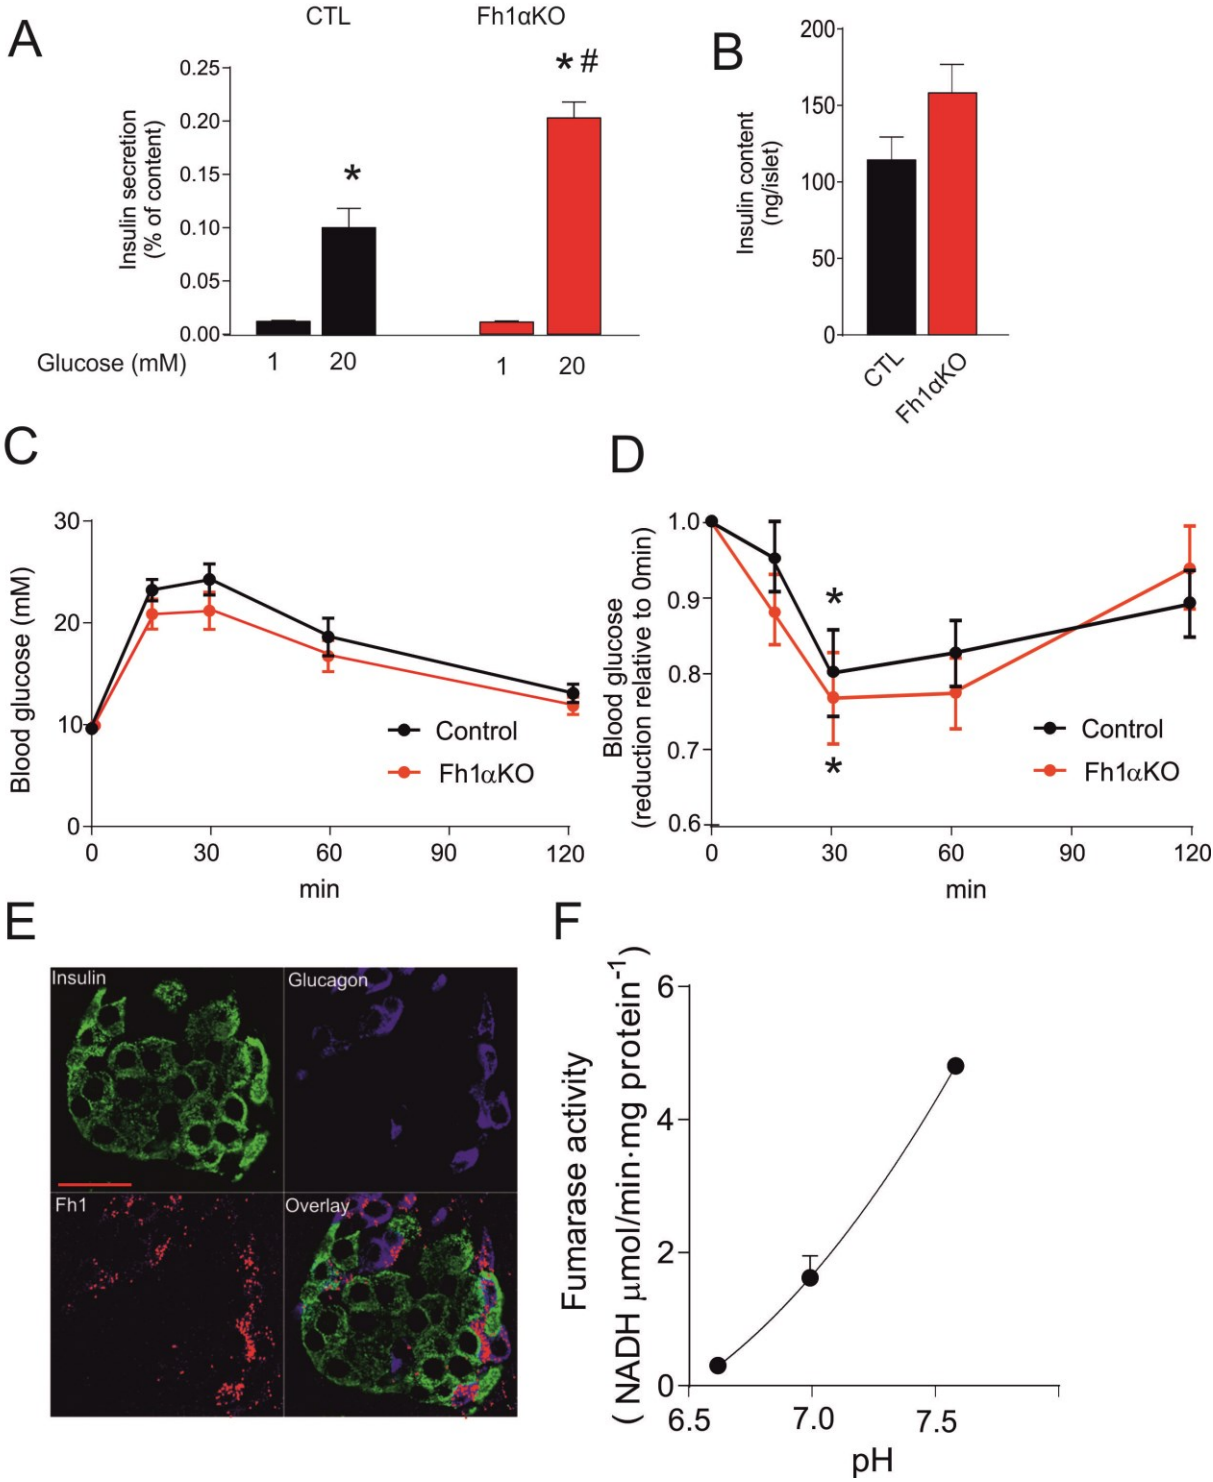

**Figure S2. Secretion and *in vivo* phenotype of Fh1αKO mice, Related to figure 2 and 4**

(A) Insulin secretion in isolated islets from control (CTL) and Fh1αKO mice at 1 and 20 mM glucose. \* $P < 0.05$  vs 1 mM glucose; # $P < 0.05$  vs 20 mM control islets (n=8-9 experiments using islets from 6 mice).

- (B) Insulin content in control (CTL) and Fh1 $\alpha$ KO mice.
- (C) Glucose tolerance in control (CTL) and Fh1 $\alpha$ KO mice; glucose tolerance was overall significantly different ( $p > 0.05$ ) in Fh1 $\alpha$ KO mice compared with control (n=10-11 mice).
- (D) Insulin tolerance in control (CTL) and Fh1 $\alpha$ KO mice; \*  $P < 0.05$  vs 0 min (n=10-11 mice).
- (E) Immunofluorescence of insulin (green), glucagon (blue), Fh1 (red) and overlay of 2SC and hormones in Fh1 $\beta$ KO islets. Note the punctate distribution of fumarase (likely to represent mitochondria) in  $\alpha$ -cells and lack of FH in the  $\beta$ -cells (in which it has been genetically ablated). Representative image of an islet from an Fh1 $\beta$ KO mouse (n=20 islets from 3 Fh1 $\beta$ KO mice). There was no overlap of glucagon and insulin (suggesting that there is no transdifferentiation; cf. (Brereton et al., 2014)). Scale bar: 50  $\mu$ m.
- (F) Relationship between  $pH_i$  and fumarase activity (measured as NADH production from purified enzyme). The curve is a least-squares fit to the data points (n=3 experiments).

Data are mean values  $\pm$  SEM.

## Figure S3

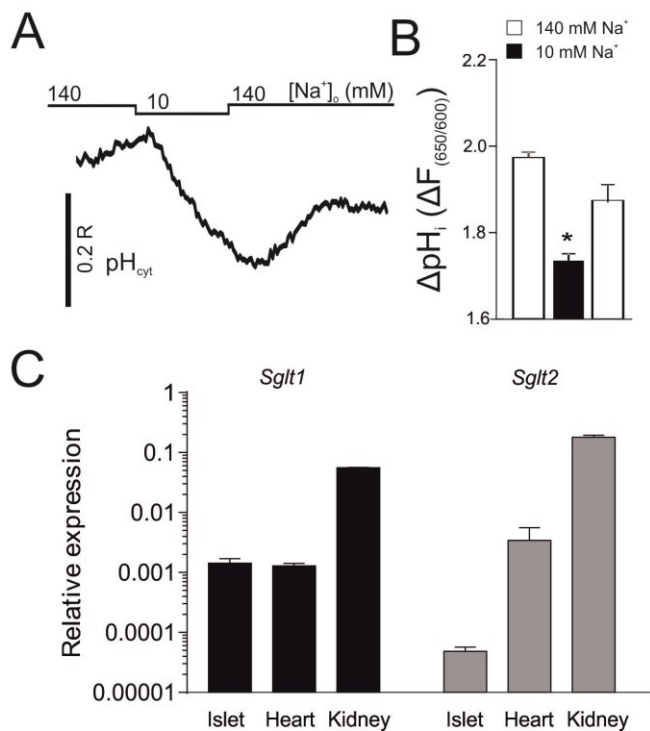

**Figure S3. SGLT-dependent acidification of  $\alpha$ -cells, Related to figure 4.**

(A) Intracellular pH ( $pH_i$ ) measured in wildtype mouse  $\alpha$ -cells at normal (140 mM) or reduced (10 mM) extracellular  $Na^+$  ( $[Na^+]_o$ ) in the presence of 10 mM glucose.  $[Na^+]_o$  was lowered as indicated by horizontal bar.  $pH_i$  was measured using the fluorescent probe SNARF-5F and is expressed as SNARF fluorescence ratio (R), ( $F_{650}/F_{600}$ ). Experiment performed in the presence of 10 mM glucose and 0.2 mM diazoxide (to clamp the membrane potential at  $\sim -70$  mV).

(B) Effect of extracellular sodium ( $[Na^+]_o$ ) on  $pH_i$ . Mean fluorescence ratios of experiments of the type shown in (A). \* $P < 0.05$  vs initial exposure to 140 mM  $[Na^+]_o$  (n=59 cells).

(C) qPCR of mRNA expression of the genes encoding the  $Na^+$ -dependent glucose co-transporters SGLT1 and 2 (*Slc5a1* and *Slc5a2*) in wildtype C57BL/6J islets (n=5), heart (n=5) kidney (n=3). Note use of logarithmic ordinate scale.

Data are mean values  $\pm$  SEM.

## Figure S4

A

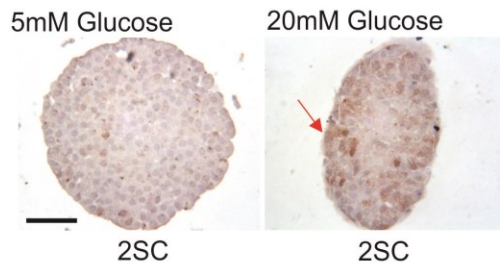

B

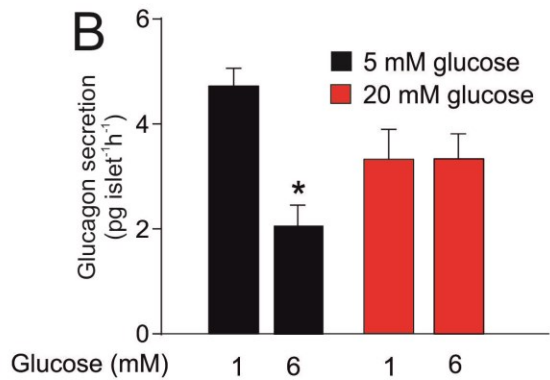

C

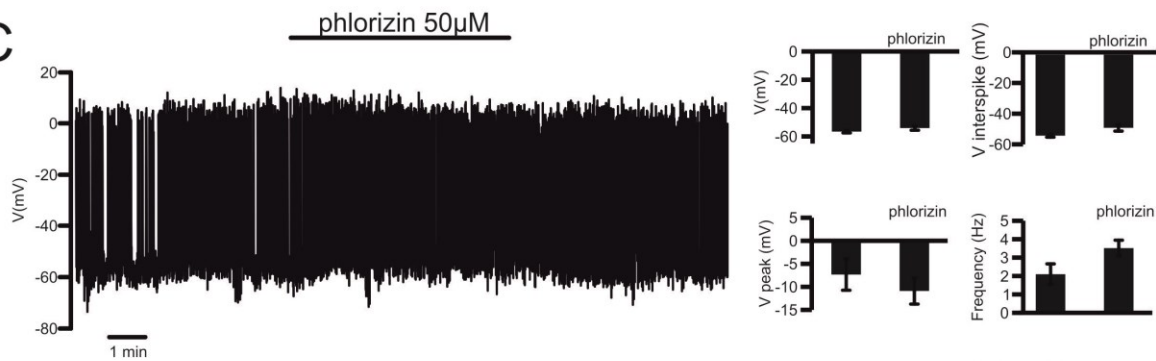

D

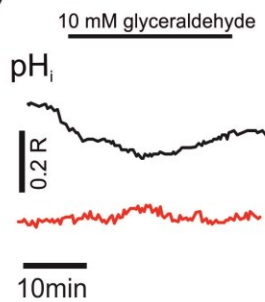

E

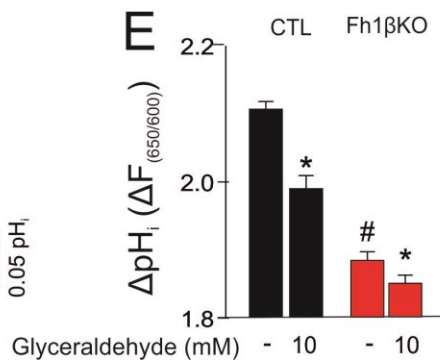

F

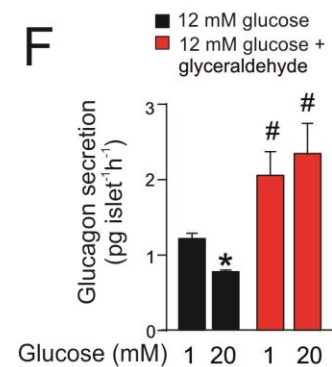

### Figure S4. Effects of chronic exposure to glucose and D-glyceraldehyde on glucagon secretion, Related to Figure 5.

(A) IHC for 2SC in wild type islets cultured at 5 mM and 20 mM glucose for 24 h. Note 2SC labelling of peripheral islet cells (likely to be  $\alpha$ -cells; red arrow). Representative of at least 50 islets from 3 mice.

(B) Glucagon secretion from human islets after 24 h of culture at 5 and 20 mM glucose and then testing glucagon secretion at 1 and 6 mM glucose. Data are based on 9-10 experiments using islets from 3 different donors. \* $P < 0.05$  vs 1 mM glucose.

(C) Electrical activity in  $\alpha$ -cell exposed to 20 mM glucose with or without 50  $\mu$ M phlorizin as indicated. Representative of 4 experiments from 2 mice and histograms summarizing the most repolarized interspike membrane potential (left), the peak potential (middle) and the frequency of action potentials at 20 mM glucose with/without phlorizin (4 cells: >100 action potential for each conditions and for every cell).

(D) Effect of glyceraldehyde on  $\alpha$ -cell  $pH_i$  in control (CTL) and hyperglycemic Fh $\beta$ 1KO mice.  $pH_i$  was measured using the fluorescent probe SNARF-5F and is expressed as SNARF fluorescence ratio (R), ( $F_{650}/F_{600}$ ). The traces have been offset to reflect the true difference in fluorescence ratios between control and Fh1 $\beta$ KO  $\alpha$ -cells.

(E) Histogram summarizing the effect of glyceraldehyde on  $\alpha$ -cell  $pH_i$  in islets from control (CTL) and hyperglycemic Fh1 $\beta$ KO mice.

(F) Glucagon secretion from wild type mouse islets at 1 and 20 mM glucose as indicated after 24 h of culture at 12 mM glucose supplemented with 10 mM D-glyceraldehyde. \* $P < 0.05$  vs 1 mM glucose. # $P < 0.05$  vs 1 mM glucose vs 1 mM glucose in islets cultured at 12 mM glucose alone (n=4-6 experiments using islets from 6 mice).

Data are mean values  $\pm$  SEM.



Figure S5

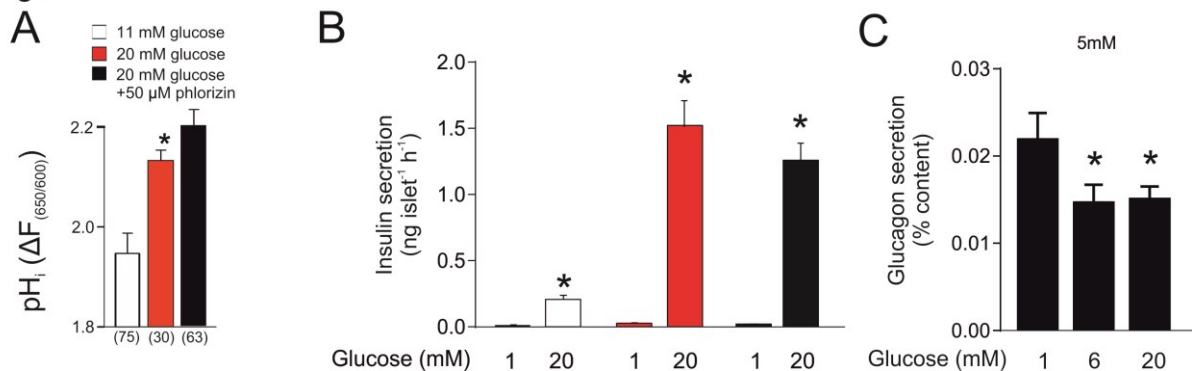

**Figure S5. Impact of chronic glucose exposure and phlorizin on  $\beta$ -cell pH<sub>i</sub> and glucose-induced insulin secretion, Related to figure 5.**

(A) Basal (pH<sub>i</sub>) measured in  $\beta$ -cell in islets cultured at 11 mM or 20 mM glucose or 20 mM glucose + 50  $\mu$ M phlorizin using the pH indicator SNARF. \* $P$ <0.05 vs 1 mM glucose.

(B) As in (A) but insulin secretion was measured at 1 mM or 20 mM glucose. \* $P$ <0.05 vs 1 mM glucose.

(C) Glucagon secretion during 1 h static incubation in wildtype islets incubated at 5 mM for 48h, at 1, 6 and 20 mM glucose as indicated. (n=6 experiments from 6 mice). \* $P$ <0.05 vs 1 mM glucose; \* $P$ <0.05 vs 1 mM glucose

Data are mean values  $\pm$  SEM.

Figure S6

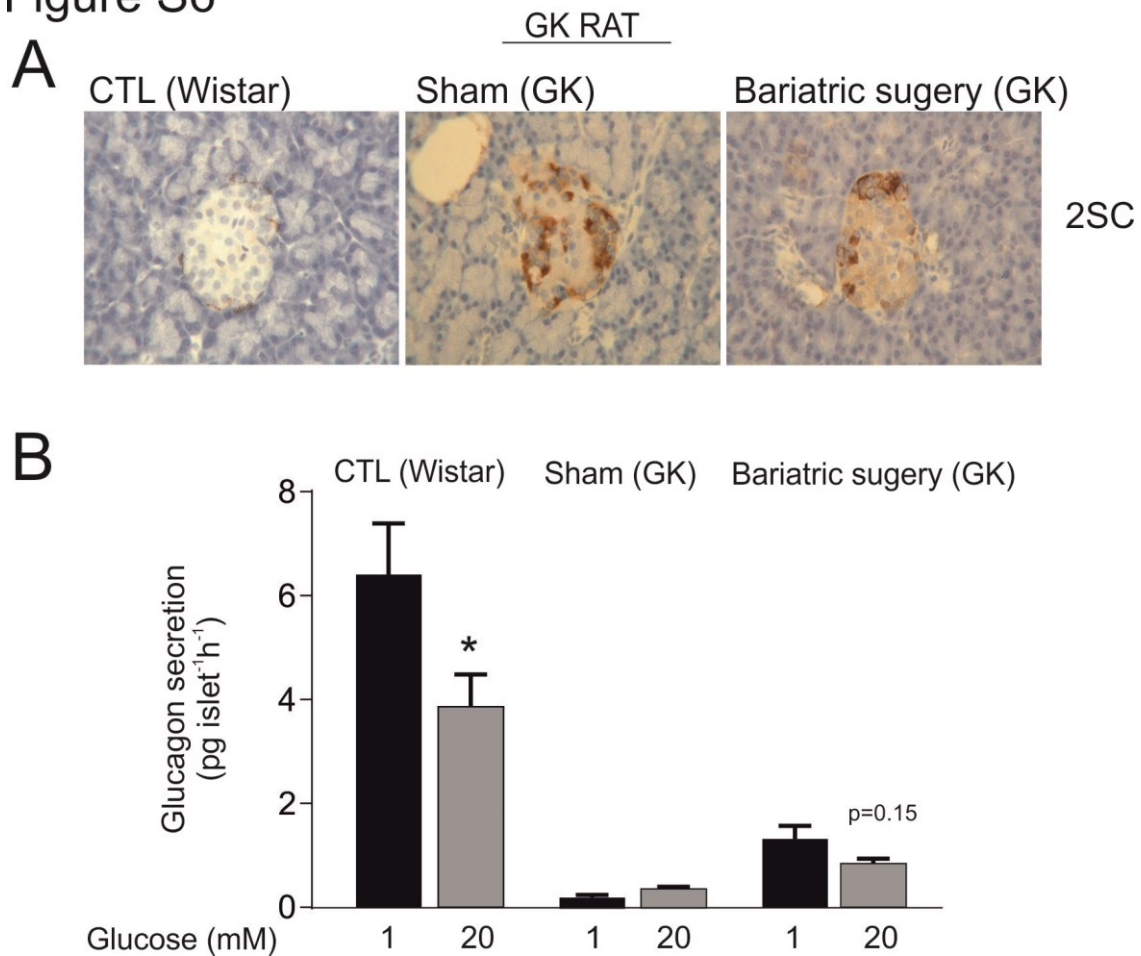

**Figure S6. Persistent protein succination and impaired glucagon secretion after restoration of normoglycemia by RYGB surgery, Related to figure 6**

(A) Pancreatic sections from Wistar (left), diabetic GK (middle), and GK RYGB (i.e. rats that had been diabetic, but in which diabetes has been resolved following RYGB surgery) immunostained for 2SC. Scale bar: 50 $\mu$ m.

(B) Glucagon secretion during 1 h static incubation in non-diabetic Wistar rats, diabetic GK rats and GK RYGB rats at 1 and 20 mM glucose as indicated. (n=2-5 experiments based on islets collected from >6 rats for each condition). \* $P < 0.05$  vs 1 mM glucose; p=0.15 vs 1mM glucose within GK RYGB.

Data are mean values  $\pm$  SEM.

Figure S7

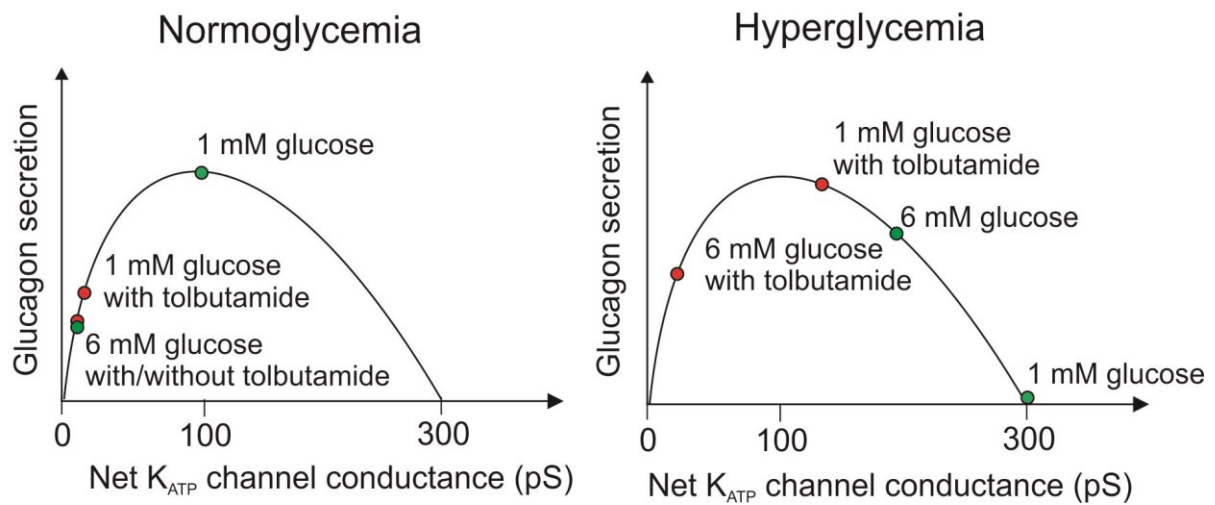

**Figure S7 Bell-shaped relationship between K<sub>ATP</sub> channel activity and glucagon secretion, Related to figure 3.**

A bell-shaped relationship between K<sub>ATP</sub> channel activity and glucagon secretion can explain the different effects of elevated glucose and tolbutamide in normoglycemic wildtype and hyperglycemic Fh1 $\beta$ KO and  $\beta$ V59M islets. K<sub>ATP</sub> channel activity is expressed as net conductance (in pS). Values are obtained from (Zhang et al., 2013). K<sub>ATP</sub> channel activity in the absence and presence of tolbutamide is represented by the green and red symbols, respectively. Under normoglycemic conditions, K<sub>ATP</sub> channel activity at low glucose (e.g. 1 mM) is close to that associated with maximum glucagon secretion (100 pS). Increasing glucose to 6 mM increases the intracellular ATP/ADP-ratio leading to complete inhibition of K<sub>ATP</sub> channel activity and glucagon secretion is inhibited because of membrane depolarization and voltage-dependent inactivation of the tetrodotoxin (TTX)-sensitive Na<sup>+</sup> channels. The K<sub>ATP</sub> channel blocker tolbutamide will also reduce K<sub>ATP</sub> channel activity and inhibit glucagon secretion but when used at a concentration of 10  $\mu$ M it will only block 50% of channel activity (from 100 to 50 pS) resulting in partial inhibition of glucagon secretion and glucagon secretion is reduced to levels close to that seen at 6 mM glucose alone. Accordingly, increasing glucose from 1 to 6 mM in the presence of 10  $\mu$ M tolbutamide does not produce much further inhibition. In contrast in islets from hyperglycemic

animals,  $K_{ATP}$  channel activity is slightly increased (to 300 pS; estimated from the suppression of glucagon secretion), resulting in membrane repolarization, inhibition of action potential firing and suppression of glucagon secretion (Figure 3E, right). Although an increase in glucose under these conditions will still reduce  $K_{ATP}$  channel activity (by 100 pS), the suppression is not sufficient to produce a net inhibition of glucagon secretion and it may even result in a stimulation of glucagon secretion. However, when  $K_{ATP}$  channel activity is first reduced by 50% by tolbutamide (i.e. to 150 pS),  $K_{ATP}$  channel activity is brought into the range associated with a high rate of glucagon secretion and a further glucose-induced decrease in  $K_{ATP}$  will result in inhibition of glucagon secretion.

| <b>Subject</b> | <b>Age</b> | <b>Sex</b> | <b>Years from diagnosis</b> | <b>BMI</b> |
|----------------|------------|------------|-----------------------------|------------|
| Control        |            |            |                             |            |
| 1              | 58         | Male       | NA                          | -          |
| 2              | 27         | Female     | NA                          | -          |
| 3              | 78         | Male       | NA                          | -          |
| 4              | 72         | Female     | NA                          | -          |
| 5              | 80         | Female     | NA                          | -          |
| 6              | 65         | Male       | NA                          | -          |
| Diabetic       |            |            |                             |            |
| 1              | 76         | Female     | 28                          | 24.6       |
| 2              | -          | Male       | 9                           | -          |
| 3              | 76         | Male       | 17                          | 26.1       |
| 4              | 86         | Male       | 10                          | 23.9       |
| 5              | 71         | Male       | 8                           | -          |
| 6              | 66         | Male       | 0.5                         | -          |
| 7              | 49         | Male       | 6                           | -          |

**Supplemental Table S1. Details of non-diabetic (control) and diabetic donors used for 2SC Immunohistochemistry, Related to figure 6**

Abbreviations: NA, not applicable. BMI, body-mass index. -, information not available.
